# Supplementary material for: MMHub, a database for the mulberry metabolome
Source: Database (Oxford). 2020 Mar 11;2020:baaa011. doi: 10.1093/database/baaa011 (PMC7065671; doi:10.1093/database/baaa011)
Supplement: Table_S1-3_baaa011 [file table_s1-3_baaa011.xlsx]

## Sheet: Table S1
Supplemental Table 1. Metabolite reporting checklist
Metabolite Reporting Checklist
Level	Aspect	Information	Fill in
general aspect	Type of metabolome analysis	targeted metabolite analysis	FALSE
		non-targeted metabolite class scale profiling	FALSE
		non-targeted metabolome scale profiling	TRUE
		non-targeted finger printing of mass features	FALSE
	Type of quantification	absolute or quantification	Quantification
	Type of reference samples	chemcially defined	FALSE
		biologically defined	More than 50 divergent samples were mixed as the reference sample
	Type of replication	analytical (same analytical sample preparation)	1
		technological (same biological preparation)	0
		biological (same experimental condition)	2
		full experiment	2
	Type of technology	reference publication	Plant Cell reference style
	Sample preparation	method of sample preparation	Chemically non-modified|derivatized (70% methanol)
		method of chromatography/separation	Gradient elute (Column: Aquity UPLC BEH C18 )
		method of ionization	ESI
		method of detection	specify detection type (MS) and instrumentation (Thermo Scientific™ Q Exactive™ hybrid quadrupole-Orbitrap mass spectrometer)
metabolite/mass feature	Metabolite	metabolite name	m****
		metabolite sum formula	The formula were calculated by Qualitative Analysis B.04.00
		metabolite structure and public source of metabolite identifier	Massbank_database、METLIN-Scripps Center for Metabolomics and Spectrometry and Human Metabolome Database
	Identification	identification process	manually supervized
		by authentic mass isotopomer added to one or all biological sample(s)	FALSE
		by authentic reference compound within a co-processed reference mixture	TRUE
		by authentic reference compound previously mapped to the analytical system	TRUE
		reference library	Massbank_database、METLIN-Scripps Center for Metabolomics and Spectrometry and Human Metabolome Database
		type of mass spectrum	Thermo Scientific™ Q Exactive™ hybrid quadrupole-Orbitrap mass spectrometer
		by match of molecular mass (single mass fragment)	The molecular mass were correct to 0.0001
		by match of fragments	Match the main fragments
		by match of fragmentation pattern	Specify set of mass fragment
		by match of mass spectrum to reference library	Match the molecular mass and the main fragments
		type of retention index	FALSE
		by match of retention time (index) to reference library	FALSE
	Quantification	type of quantification	Relative quantification
	Validity testing	Recovery testing (chemical analog)	FALSE
		Recovery testing (internally added mass isotopomer)	FALSE
		Recovery testing (mixture of most divergent samples from the experiment)	FALSE
		Test for linear range	FALSE
		Limit of quantification (LOQ)	FALSE
		Limit of detection (LOD)	FALSE

## Sheet: Table S2
Supplemental Table 2. Metabolite checklist and recommendations for LC-MS.
Q Exactive LC-MS/MS metabolites:
	A	B	C	D	E	F	G	H	I	J	K	L	M	N	O	P	Q
1
2	Experiment title: The (almost) non-redundant MS2 spectral tag (MS2T) library of Mulberry leaf.
3	Organism/Plant species: Mulberry
4	Organ/tissue: Leaf
5	Analytical tool: Thermo Xcalibur 2.2.0
6
7	Peak no.- number referenced back to the main text
8	Ret . Time- retention time, in minutes
9	InChI- accurate structure identifiers
10	InChIKey- international Chemical Identifier Keys
11	CID- PubChem Compound Identifiers
12	Database comparisions- metabolites demonstrated in those databases
13	Putative Name- putative identification of the metabolite
14	Metabolite Class- classfication of metabolites
15	Mol. Formula- molecular formula of the metabolite
16	Theor. m/z- theoretical monoisotopic mass calculated for the ion (M+H)+
17	Found m/z- mass detected in the experiment
18	m/z error (ppm)- difference between theoretical and found m/z values in ppm
19	MSMS fragments- fragments, obtained from the ion (M+H)+
20	MS/MS CE (eV)- collision energy used for fragmentation optional
23	I, II, III- different isomers
24	Identification level (A; B; C; D)- (A) standard; (B) MS/MS; (C) MSE; (D) MS only
25
26	Peak no.	Ret. Time (min)	InChI	InChIKey	PubChem Compound Identifiers (CID)	Database comparisons	Putative metabolite name	Metabolite Class	Mol formula	ES(+) Theor m/z	ES(+) Found m/z	m/z error (ppm)	MS/MS ES(+) fragments	MS/MS ES(+) CE (eV)	Species detected before	References	Identification level (A-D)
27	m0002	1.23									102.034		102.0342 56.9657 88.0237 67.5107 76.5159 79.0185	30
28	m0004	1.39	InChI=1S/C5H14NO/c1-6(2,3)4-5-7/h7H,4-5H2,1-3H3/q+1	OEYIOHPDSNJKLS-UHFFFAOYSA-N	305	MassBank	Choline	Vitamin	C5H14NO	104.107	104.107	2.88165	104.1073 60.0816 87.0446 58.0659	30			A
29	m0005-1	1.46	InChI=1S/C3H7NO3/c4-2(1-5)3(6)7/h2,5H,1,4H2,(H,6,7)/t2-/m0/s1	MTCFGRXMJLQNBG-REOHCLBHSA-N	5951	MassBank	L-Serine	Amino acid	C3H7NO3	106.05	106.05	0.942952	106.0500 60.0452 88.0398	30			A
30	m0006	2.52									107.049		107.0495 95.0496 79.0549 105.0451	30
31	m0008	4.69									107.049		107.0495 95.0496 79.0549 91.0547 105.0451	30
32	m0023	1.32									112.896		112.8960 109.5733 71.0833 91.1559	30
33	m0023-1	1.92	InChI=1S/C4H4N2O2/c7-3-1-2-5-4(8)6-3/h1-2H,(H2,5,6,7,8)	ISAKRJDGNUQOIC-UHFFFAOYSA-N	1174	KNApSAcK	Uracil	Nucleotide	C4H4N2O2	113.035	113.035	1.76937	113.0348 96.0084 70.0295	30	Zea mays	Suzuki, R. et al., Chemical and Pharmaceutical Bulletin (2007) 153-155	B
34	m0025	5.1									114.092		114.0916 72.9378 90.9482 68.0502 96.0811	30
35	m0029	1.45	InChI=1S/C5H9NO2/c7-5(8)4-2-1-3-6-4/h4,6H,1-3H2,(H,7,8)/t4-/m0/s1	ONIBWKKTOPOVIA-BYPYZUCNSA-N	145742	MassBank	L-Proline	Amino acid	C5H9NO2	116.071	116.071	1.72309	116.0708 70.0659	30			A
36	m0030	1.51	InChI=1S/C5H11NO2/c1-3(2)4(6)5(7)8/h3-4H,6H2,1-2H3,(H,7,8)/t4-/m0/s1	KZSNJWFQEVHDMF-BYPYZUCNSA-N	6287	METLIN	L-Valine	Amino acid	C5H11NO2	118.086	118.087	1.69368	118.0865 72.0815 55.0551	30			A
37	m0036-1	1.52	InChI=1S/C4H9NO3/c1-2(6)3(5)4(7)8/h2-3,6H,5H2,1H3,(H,7,8)/t2-,3+/m1/s1	AYFVYJQAPQTCCC-GBXIJSLDSA-N	6288	MassBank	L-Threonine	Amino acid	C4H9NO3	120.066	120.066	1.66576	120.0657 74.0608 56.0504 102.0553	30			A
38	m0039	2.97	InChI=1S/C7H8N2/c8-7(9)6-4-2-1-3-5-6/h1-5H,(H3,8,9)	PXXJHWLDUBFPOL-UHFFFAOYSA-N	2332	MassBank	Benzamidine	Polyphenol	C7H8N2	121.076	121.076	3.30371	121.0764 104.0579 94.0737 92.0579	30			A
39	m0044	2.16	InChI=1S/C6H6N2O/c7-6(9)5-3-1-2-4-8-5/h1-4H,(H2,7,9)	IBBMAWULFFBRKK-UHFFFAOYSA-N	15070	METLIN	Picolinamide	Others	C6H6N2O	123.055	123.055	-0.812643	123.0552 80.0501 96.0449 106.0290	30	Escherichia coli	Atkins, J. L. et al., Journal Of the American Chemical Society (2012) 13546-13549	B
40	m0046	1.5	InChI=1S/C6H5NO2/c8-6(9)5-2-1-3-7-4-5/h1-4H,(H,8,9)	PVNIIMVLHYAWGP-UHFFFAOYSA-N	938	METLIN	Nicotinic acid	Vitamin	C6H5NO2	124.039	124.039	0.806196	124.0394 96.0448 80.0501	30	Homo sapiens	Bogan, K. L. et al., Annual Review of Nutrition (2008) 115-130	B
41	m0049	8.38									125.096		125.0961 55.0551 81.0705 79.0549 69.0707 82.0656	30
42	m0052	6.74									126.091		126.0915 109.0650 81.0705 55.0551 98.0605	30
43	m0056	1.5	InChI=1S/C6H11NO2/c8-6(9)5-3-1-2-4-7-5/h5,7H,1-4H2,(H,8,9)/t5-/m0/s	HXEACLLIILLPRG-YFKPBYRVSA-N	6931663	MassBank	L-Pipecolate	Alkaloid	C6H11NO2	130.086	130.086	-0.35	130.0863 84.0814	30			A
44	m0060	1.52	InChI=1S/C6H13NO2/c1-3-4(2)5(7)6(8)9/h4-5H,3,7H2,1-2H3,(H,8,9)/t4-,5-/m0/s1	AGPKZVBTJJNPAG-WHFBIAKZSA-N	6306	Massbank	L-Isoleucine	Amino acid	C6H13NO2	132.102	132.102	0.04	132.1019 86.0970 84.0814 69.0707	30			A
45	m0061	2.01	InChI=1S/C6H13NO2/c1-4(2)3-5(7)6(8)9/h4-5H,3,7H2,1-2H3,(H,8,9)/t5-/m0/s1	ROHFNLRQFUQHCH-YFKPBYRVSA-N	6106	Massbank	L-Leucine	Amino acid	C6H13NO2	132.102	132.102	0.04	132.1019 86.0970 69.0706	30			A
46	m0062	1.56	InChI=1S/C4H8N2O3/c5-2(4(8)9)1-3(6)7/h2H,1,5H2,(H2,6,7)(H,8,9)/t2-/m0/s1	DCXYFEDJOCDNAF-REOHCLBHSA-N	6267	Massbank	L-Asparagine	Amino acid	C4H8N2O3	133.061	133.061	1.50307	133.0610 74.0244 87.0559 88.0400 116.0348	30			A
47	m0071	1.48	InChI=1S/C5H11NO3/c7-2-3-5(9)4(8)1-6-3/h3-9H,1-2H2/t3-,4-,5-/m1/s1	OQEBIHBLFRADNM-UOWFLXDJSA-N	451991	METLIN	1,4-dideoxy-1,4-imino-D-arabinitol	Alkaloid	C5H11NO3	134.081	134.081	-0.23	134.0812 98.0604 116.0708 80.0501 68.0503	30	Mulberry	Mizushina, Y. et al., Biochemical And Biophysical Research Communications (2003) 78-85	B
48	m0071-1	1.26	InChI=1S/C4H7NO4/c5-2(4(8)9)1-3(6)7/h2H,1,5H2,(H,6,7)(H,8,9)/t2-/m0/s1	CKLJMWTZIZZHCS-REOHCLBHSA-N	5960	MassBank	L-Aspartic acid	Amino acid	C4H7NO4	134.045	134.045	-0.12	134.0448 74.0244 88.0398	30			A
49	m0087	1.92	InChI=1S/C5H5N5/c6-4-3-5(9-1-7-3)10-2-8-4/h1-2H,(H3,6,7,8,9,10)	GFFGJBXGBJISGV-UHFFFAOYSA-N	190	METLIN	Adenine	Vitamin	C5H5N5	136.062	136.062	-0.73496	136.0617 119.0354 94.0404	30			A
50	m0093	1.44									138.055		138.0549 94.0656 92.0499 110.0603	30
51	m0094	4.65									138.091		138.0913 110.0967 120.0809 95.0858 55.9353	30
52	m0096	4.46									139.039		139.0390 111.0443 65.0394 93.0340 56.9657 121.0287	30
53	m0104	1.9									144.102		144.1018 98.0968 84.0814 70.0659	30
54	m0107	1.27	InChI=1S/C6H14N2O2/c7-4-2-1-3-5(8)6(9)10/h5H,1-4,7-8H2,(H,9,10)/t5-/m0/s1	KDXKERNSBIXSRK-YFKPBYRVSA-N	5962	Massbank	L-Lysine	Amino acid	C6H14N2O2	147.113	147.113	-0.679751	147.1127 84.0814 130.0863	30			A
55	m0108	1.5									147.085		147.0849 84.0450 130.0499 101.0793 56.0584	30
56	m0112	1.49	InChI=1S/C6H13NO3/c8-3-4-6(10)5(9)1-2-7-4/h4-10H,1-3H2/t4-,5-,6-/m1/s1	YZNNBIPIQWYLDM-HSUXUTPPSA-N	72259	METLIN	Fagomine	Alkaloid	C6H13NO3	148.097	148.097	-0.675234	148.0967 86.0606 130.0863 112.0759	30	Mulberry	Zhang, N. et al., Analytical Methods (2013) 2445-2460	B
57	m0112-1	1.27	InChI=1S/C5H9NO4/c6-3(5(9)10)1-2-4(7)8/h3H,1-2,6H2,(H,7,8)(H,9,10)/t3-/m0/s1	WHUUTDBJXJRKMK-VKHMYHEASA-N	33032	Massbank	L-Glutamic acid	Amino acid	C5H9NO4	148.06	148.06	0.23	148.0604 84.0813 102.0553	30			A
58	m0123	18.56									149.023		149.0233 121.0285 111.0443 93.0340	30
59	m0125	1.51	InChI=1S/C5H11NO2S/c1-9-3-2-4(6)5(7)8/h4H,2-3,6H2,1H3,(H,7,8)/t4-/m0/s1	FFEARJCKVFRZRR-BYPYZUCNSA-N	6137	METLIN	L-Methionine	Amino acid	C5H11NO2S	150.058	150.058	0.666408	150.0584 104.0533 56.0504 61.0115 133.0318 102.0554	30			A
60	m0135	1.45									152.071		152.0705 110.0603 92.0501	30
61	m0137	5.61	InChI=1S/C10H16O/c1-7(2)9-5-4-8(3)10(11)6-9/h4,9-11H,1,5-6H2,2-3H3/t9-,10+/m1/s1	BAVONGHXFVOKBV-ZJUUUORDSA-N	94221	METLIN	(-)-trans-Carveol	Others	C10H16O	153.127	153.127	-0.653051	153.1273 81.0705 107.0857 93.0703 79.0549 135.1168	30	Oryza sativa	Chen, W. et al., Nature Genetics (2014) 714-721	B
62	m0139	1.26	InChI=1S/C6H9N3O2/c7-5(6(10)11)1-4-2-8-3-9-4/h2-3,5H,1,7H2,(H,8,9)(H,10,11)/t5-/m0/s1	HNDVDQJCIGZPNO-YFKPBYRVSA-N	6274	MassBank	L-Histidine	Amino acid	C6H9N3O2	156.077	156.077	-0.3	156.0768 110.0716 83.0610 93.0452 95.0609	30			A
63	m0154	1.45	InChI=1S/C7H15NO3/c1-8(2,3)5-6(9)4-7(10)11/h6,9H,4-5H2,1-3H3/t6-/m1/s1	PHIQHXFUZVPYII-ZCFIWIBFSA-N	10917	MassBank	L-Carnitine	Vitamin	C7H15NO3	162.113	162.113	0.616856	162.1126 103.0394 85.0290 60.0817 102.0918	30			A
64	m0156	9.58									162.067		162.0675 56.9657 106.0735 120.0810	30
65	m0158	11.05									162.067		162.0675 56.9657 125.0962 134.0600 79.0549	30
66	m0161	4.12									163.039		163.0388 89.0391 135.0441 117.0337 145.0284	30
67	m0166	1.28	InChI=1S/C6H13NO4/c8-2-3-5(10)6(11)4(9)1-7-3/h3-11H,1-2H2/t3-,4+,5-,6-/m1/s1	LXBIFEVIBLOUGU-JGWLITMVSA-N	29435	METLIN	1-deoxynojirimycin-I	Alkaloid	C6H13NO4	164.092	164.092	0.609415	164.0918 146.0812 128.0708 110.0604 80.0502	30	Mulberry	Zhang, N. et al., Analytical Methods (2013) 2445-2460	B
68	m0167	1.5	InChI=1S/C6H13NO4/c8-2-3-5(10)6(11)4(9)1-7-3/h3-11H,1-2H2/t3-,4+,5-,6-/m1/s1	LXBIFEVIBLOUGU-JGWLITMVSA-N	29435	METLIN	1-deoxynojirimycin-II	Alkaloid	C6H13NO4	164.092	164.092	-0.609415	164.0916 146.0810 110.0603 128.0708 80.0500	30	Mulberry	Zhang, N. et al., Analytical Methods (2013) 2445-2460	A
69	m0170	3	InChI=1S/C9H11NO2/c10-8(9(11)12)6-7-4-2-1-3-5-7/h1-5,8H,6,10H2,(H,11,12)/t8-/m0/s1	COLNVLDHVKWLRT-QMMMGPOBSA-N	6140	MassBank	L-Phenylalanine	Amino acid	C9H11NO2	166.086	166.086	-2.40839	166.0859 120.0809 103.0546	30			A
70	m0171	1.2									167.048		167.0478 121.0167 144.0325 139.0271 103.0062	30
71	m0177	1.92	InChI=1S/C8H9NO3/c1-5-8(12)7(4-11)6(3-10)2-9-5/h2,4,10,12H,3H2,1H3	RADKZDMFGJYCBB-UHFFFAOYSA-N	1050	METLIN	Pyridoxal	Vitamin	C8H19NO3	168.065	168.065	-1.19001	168.0653 150.0550 94.0657 122.0602 67.0550	30	Nicotiana tabacum	Huang, S. H. et al., Plant Physiology And Biochemistry (2012) 114-119	B
72	m0179	1.92	InChI=1S/C8H11NO3/c1-5-8(12)7(4-11)6(3-10)2-9-5/h2,10-12H,3-4H2,1H3	LXNHXLLTXMVWPM-UHFFFAOYSA-N	1054	KNApSAcK	Pyridoxine	Vitamin	C8H11NO3	170.081	170.081	-0.18	170.0812 152.0706 134.0600 124.0575 136.0616	30			A
73	m0187	5.44									174.149		174.1489 156.1383 150.9689 69.0706 72.9379	30
74	m0188	1.28	InChI=1S/C6H14N4O2/c7-4(5(11)12)2-1-3-10-6(8)9/h4H,1-3,7H2,(H,11,12)(H4,8,9,10)/t4-/m0/s1	ODKSFYDXXFIFQN-BYPYZUCNSA-N	6322	METLIN	L-Arginine	Amino acid	C6H14N4O2	175.119	175.119	-0.57104	175.1189 70.0659 116.0708 60.0565 130.0974 158.0921	30			A
75	m0195	8.18									175.148		175.1480 119.0857 133.1011 105.0702 91.0547 147.1167	30
76	m0197-1	1.42	InChI=1S/C7H13NO4/c9-4-3-1-2-7(12,8-3)6(11)5(4)10/h3-6,8-12H,1-2H2/t3?,4-,5+,6+,7?/m0/s1	FXFBVZOJVHCEDO-NMACYSKISA-N	443000	METLIN	Nortropanoline (Calystegin B2)	Alkaloid	C7H13NO4	176.092	176.092	0.567886	176.0918 132.0211 140.0706 158.0812	30	Mulberry	Zhang, N. et al., Analytical Methods (2013) 2445-2460	B
77	m0200	7.38									177.164		177.1637 121.1012 107.0858 95.0859 93.0704 69.0706	30
78	m0205	1.39	InChI=1S/C7H15NO4/c1-8-2-5(10)7(12)6(11)4(8)3-9/h4-7,9-12H,2-3H2,1H3/t4-,5+,6-,7-/m1/s1	AAKDPDFZMNYDLR-XZBKPIIZSA-N	92381	METLIN	N-methyl-1-deoxynojirimycin	Alkaloid	C7H15NO4	178.107	178.107	-2.24584	178.1070 134.0191 118.0864 87.0445 142.0862 160.0967	30	Mulberry	Zhang, N. et al., Analytical Methods (2013) 2445-2460	B
79	m0206	4.37									178.123		178.1225 134.0964 118.0653	30
80	m0210	2.9									180.138		180.1382 162.1274 105.0701 112.0760	30
81	m0215	12.31									181.122		181.1222 163.1117 98.9757 116.9861 134.9964 93.0704	30
82	m0217	1.41	InChI=1S/C9H11NO3/c10-7(9(12)13)5-6-3-1-2-4-8(6)11/h1-4,7,11H,5,10H2,(H,12,13)	WRFPVMFCRNYQNR-UHFFFAOYSA-N	91482	METLIN	DL-o-Tyrosine	Amino acid	C9H11NO3	182.081	182.081	-2.74603	182.0807 136.0757 123.0443 91.0548 119.0494 165.0547	30	Mulberry	Hossain, M.A. Corrosion Engineering (2007) 172-182	B
83	m0218	1.92	InChI=1S/C9H11NO3/c10-8(9(12)13)5-6-1-3-7(11)4-2-6/h1-4,8,11H,5,10H2,(H,12,13)/t8-/m0/s1	OUYCCCASQSFEME-QMMMGPOBSA-N	6057	Massbank	L-Tyrosine	Amino acid	C9H11NO3	182.081	182.081	-0.17	182.0812 136.0757 91.0548 123.0442 119.0493 165.0547	30			A
84	m0220	8.96									183.078		183.0781 98.9846 127.0155 155.0466	30
85	m0223	2.05									184.133		184.1333 124.1122 119.0191 137.0295	30
86	m0228	6.43									189.127		189.1273 156.0933 171.1168 119.0858 105.0702 145.1013	30
87	m0229	11.44									189.091		189.0908 147.0803 91.0547 171.0802 128.0623 105.0702	30
88	m0230	12.48									189.091		189.0909 147.0804 91.0547 128.0622 171.0800 119.0857	30
89	m0235	17.85									189.091		189.0909 147.0803 91.0547 171.0799 128.0622	30
90	m0237	6.1									191.143		191.1432 133.1012 105.0701 173.1328 91.0547 107.0859	30
91	m0248	7.38	InChI=1S/C10H8O4/c1-13-9-4-6-2-3-10(12)14-8(6)5-7(9)11/h2-5,11H,1H3	RODXRVNMMDRFIK-UHFFFAOYSA-N	5280460	Massbank	Scopoletin	Polyphenol	C10H8O4	193.049	193.049	0.18	193.0495 133.0284 178.0260 137.0596 122.0364 150.0311	30	Mulberry	Li, X.U. Science of Sericulture (2008) 593-596	B
92	m0251	11.76									193.122		193.1223 91.0547 93.0704 133.1012 79.0549 105.0702	30
93	m0252	17.2									193.159		193.1586 109.0651 95.0495 175.1475 107.0858 69.0706	30
94	m0253	4.92									194.081		194.0811 148.0756 176.0705 120.0809	30
95	m0254	6.45									195.102		195.1018 177.1638 95.0860 121.1013 107.0494	30
96	m0256	9.82									195.138		195.1378 81.0705 67.0550 93.0703 79.0548 149.1323	30
97	m0262	2.56									196.097		196.0969 150.0914 178.0862 122.0602 167.9939	30
98	m0263	6.32									197.117		197.1171 150.9687 179.1066 133.1011 107.0858 173.9848	30
99	m0272	2.15									200.128		200.1280 128.0706 100.0760 70.0659 87.0444 97.0650	30
100	m0276	6.21									201.557		201.5572 98.9757 116.9861 57.0707 177.0070 191.0226	30
101	m0279	1.92									202.144		202.1436 166.1225 138.1276 184.1332 70.0659 122.0966	30
102	m0281	3.89									203.139		203.1387 84.0450 186.1123 74.0971 130.0499 57.0708	30
103	m0285	1.92									204.134		204.1343 85.0290 158.1288 71.0499 114.0916	30
104	m0291	4.24	InChI=1S/C11H12N2O2/c12-9(11(14)15)5-7-6-13-10-4-2-1-3-8(7)10/h1-4,6,9,13H,5,12H2,(H,14,15)/t9-/m0/s1	QIVBCDIJIAJPQS-VIFPVBQESA-N	6305	Massbank	L-Tryptophan	Amino acid	C11H12N2O2	205.097	205.097	-2.92544	205.0966 146.0599 118.0653 188.0705 144.0807 132.0808	30			A
105	m0292	7.83									205.044		205.0439 105.0701 98.9756 116.9860 149.0227	30
106	m0300	1.44	InChI=1S/C8H15NO5/c1-9-4-3(10)2-8(9,14)7(13)6(12)5(4)11/h3-7,10-14H,2H2,1H3	XTMAEPUCHRMBTC-UHFFFAOYSA-N	101415075	METLIN	N-Methylcalystegine C1	Others	C8H15NO5	206.102	206.102	-2.42598	206.1018 170.0807 188.0913 146.0808	30			B
107	m0317	1.3									208.972		208.9718 191.9457 94.9300 119.5049	30
108	m0325	7.47									211.133		211.1331 81.0341 83.0498 55.0551 81.0705 91.0547	30
109	m0330	9.42									211.132		211.1321 81.0341 83.0497 55.0551 81.0705 79.0549	30
110	m0344	15.66									213.148		213.1483 111.0443 181.1223 125.0597 107.0859 135.1168	30
111	m0345	6.89									215.139		215.1389 197.1283 150.9687 179.1178 132.9583 95.0861	30
112	m0346	11.62									215.164		215.1641	30
113	m0351	1.27									216.035		216.0353 119.0191 137.0295 144.0505 188.0404 131.0190	30
114	m0358	5.51									217.155		217.1545 84.0449 88.1126 200.1279 130.0498 71.0862	30
115	m0359	5.72									217.155		217.1555 84.0450 88.1126 200.1281 130.0500 71.0863	30
116	m0362	1.44									218.139		218.1387 182.1176 138.0914 200.1281 146.0811 156.1019	30
117	m0364	4.39									218.138		218.1385 154.1226 172.1331 56.0504 109.1015 67.0550	30
118	m0367	8.71									218.211		218.2113 70.0659 88.0762 106.0866 57.0707	30
119	m0370	2.95									219.134		219.1339 60.0453 86.0970 132.1020 173.1285 201.1233	30
120	m0371	5.64									219.101		219.1015 174.0675 189.0909 129.0699 141.0698 131.0855	30
121	m0372	7.19									219.101		219.1015 174.0675 189.0909 129.0699 141.0697 131.0855	30
122	m0373	16.71									219.174		219.1742 91.0547 79.0549 93.0703 81.0705 67.0550	30
123	m0375	3.7	InChI=1S/C9H17NO5/c1-9(2,5-11)7(14)8(15)10-4-3-6(12)13/h7,11,14H,3-5H2,1-2H3,(H,10,15)(H,12,13)/t7-/m0/s1	GHOKWGTUZJEAQD-ZETCQYMHSA-N	6613	MassBank	D-Pantothenic acid	Vitamin	C9H17NO5	220.118	220.118	0.2	220.1179 90.0555 202.1073 184.0968 124.0759 98.0241	30			A
124	m0378	1.33									221.024		221.0242 104.1073 60.0816	30
125	m0379	2.03									221.092		221.0923 130.0652 158.0600 175.0866 132.0444	30
126	m0380	2.34									221.092		221.0919 130.0652 158.0600 175.0865 132.0444 157.0760	30
127	m0383	9.12									221.19		221.1898 81.0705 135.1168 107.0858 93.0703 79.0549	30
128	m0384	9.4									221.19		221.1897 81.0705 135.1169 107.0859 119.0858 93.0705	30
129	m0385	11.89									221.117		221.1171 149.0597 91.0547 119.0493 203.1066 171.0803	30
130	m0389	14.36									221.117		221.1171 149.0596 91.0547 119.0493 171.0803 203.1064	30
131	m0391	4.9									222.116		222.1158 83.0861 55.0551 101.0964 134.9966	30
132	m0393	1.31									223.972		223.9720 94.9300 206.1018 97.0287 188.0921 97.5777	30
133	m0395	5.3									223.133		223.1328 149.0960 93.0704 121.0650 109.0651 205.1221	30
134	m0396	6.08									223.091		223.0908 98.9758 81.0705 116.9861 177.0069	30
135	m0397	7.72									223.096		223.0963 167.0338 149.0232 93.0340 121.0285 205.0858	30
136	m0408	8.57									225.148		225.1481 99.0445 71.0499 107.0858 183.1379 97.0652	30
137	m0415	11.1									226.18		226.1800 180.1745 81.0703 55.0550 107.0857 83.0859 93.0703	30
138	m0429	2.12									228.159		228.1592 210.1487 168.1382 150.1276 96.0812 79.0548	30
139	m0430	2.84									228.159		228.1593 210.1488 94.0656 192.1381 96.0812 70.0659	30
140	m0432	6.82									228.065		228.0647 114.0915 105.0701 98.9757 116.9860 171.0488	30
141	m0433	1.44									229.155		229.1545 70.0659 142.0863 58.0660 114.0552 60.0816	30
142	m0434	2.01									229.155		229.1546 70.0659 142.0862 114.0552 60.0816	30
143	m0437	1.3									230.886		230.8858 184.0454 202.0560 160.0454 119.0191 142.0349	30
144	m0439	4.36									230.175		230.1750 212.1644 194.1539 70.0659 95.0860 116.0709	30
145	m0440	6.07									230.154		230.1537 189.1273 81.0705 55.0551 212.1644 67.0550	30
146	m0443	4.63									231.169		231.1694 72.0815 55.0551 86.0970 132.1019 57.0582	30
147	m0445	2.19									232.118		232.1178 214.1073 85.0290 158.0811 112.0760 86.0606	30
148	m0448	3.33	InChI=1S/C10H20N2O4/c1-5(2)4-7(10(15)16)12-9(14)8(11)6(3)13/h5-8,13H,4,11H2,1-3H3,(H,12,14)(H,15,16)	BQBCIBCLXBKYHW-UHFFFAOYSA-N	4420322	METLIN	Thr-Leu	Polypeptide	C10H20N2O4	233.15	233.149	-0.857818	233.1494 74.0608 86.0970 132.1019 56.0504 187.1441	30			B
149	m0456	12.43									235.169		235.1691 93.0704 91.0548 79.0549 95.0857 67.0550	30
150	m0459	1.3									236.079		236.0794 149.0112 176.0585 162.0427 104.1074	30
151	m0466	8.24									237.185		237.1847 133.1012 81.0705 105.0702 151.1118 93.0704	30
152	m0471	2.82									238.071		238.0708 210.0760 124.0394 122.0602	30
153	m0472	8.86									239.2		239.2003 95.0860 81.0705 107.0859 93.0703 137.1324	30
154	m0476	13.31									239.164		239.1639 183.1168 171.1167 197.1323 129.0699 155.0853	30
155	m0481	17.25									239.237		239.2368 171.1167 183.1168 197.1324 129.0700	30
156	m0482	17.75									239.237		239.2367 57.0707 95.0858 67.0550 81.0706 71.0863	30
157	m0485	1.44									241.155		241.1545 104.1074 60.0816 83.4883 70.0659	30
158	m0486	1.93									241.155		241.1545 58.0660 84.0814 196.0968 70.0659 128.1071	30
159	m0488	12.99									241.143		241.1433 227.1277 163.1117 95.0861 93.0704 135.1168	30
160	m0494	6.11									243.132		243.1324 84.0450 86.0970 132.1019 197.1285 56.0503	30
161	m0495	13.95									243.159		243.1590 81.0705 147.1167 105.0702 165.1274 91.0547	30
162	m0499	1.92	InChI=1S/C9H13N3O5/c10-5-1-2-12(9(16)11-5)8-7(15)6(14)4(3-13)17-8/h1-2,4,6-8,13-15H,3H2,(H2,10,11,16)/t4-,6-,7-,8-/m1/s1	UHDGCWIWMRVCDJ-XVFCMESISA-N	6175	Massbank	Cytidine	Nucleic acid derivative	C9H13N3O5	244.093	244.094	6.1452	244.0943 112.0508 95.0245	30	Oryza sativa	Chen, W. et al., Nature Genetics (2014) 714-721	B
163	m0508	3.02									246.17		246.1698 110.0240 113.1076 141.1022 86.0970 212.0917	30
164	m0509	3.95									246.17		246.1698 228.1593 166.1226 184.1332 210.1488 81.0705	30
165	m0510	6.67									246.169		246.1695 182.1539 200.1644 81.0705 56.0503 95.0860	30
166	m0512	10.94									246.243		246.2425 88.0762 70.0659 106.0866 57.0707 228.2321	30
167	m0515	7.51	InChI=1S/C13H14N2O3/c1-8(16)15-12(13(17)18)6-9-7-14-11-5-3-2-4-10(9)11/h2-5,7,12,14H,6H2,1H3,(H,15,16)(H,17,18)	DZTHIGRZJZPRDV-UHFFFAOYSA-N	2002	METLIN	N-Acetyl-DL-tryptophan	Tryptophan metabolite	C13H14N2O3	247.108	247.107	-2.42809	247.1071 159.0916 188.0705 146.0600 132.0808 130.0652	30	Homo sapiens	Yu, M. W. et al., Journal of Pharmaceutical Sciences (2010) 82-86	B
168	m0516	9.56									247.133		247.1328 187.1117 201.1273 173.1324 229.1223 91.0547	30
169	m0517	13.37									247.096		247.0962 191.0337 205.0494 135.0440 163.0388 217.0493	30
170	m0528	4.5									249.123		249.1229 146.0600 132.0808 188.0706 118.0653 72.0451	30
171	m0529	6.89									249.112		249.1120 69.0342 85.0290 81.0341 127.0390 87.0082	30
172	m0530	7.23									249.112		249.1119 129.0699 159.0804 187.0752 131.0855 128.0621	30
173	m0531	7.47									249.112		249.1120 79.0549 107.0494 69.0343 85.0290 87.0082	30
174	m0532	8.64									249.088		249.0882 159.0807 219.1017 69.0341 91.0549 81.0339	30
175	m0540	8.23									250.096		250.0961 98.9757 116.9860 177.0072 121.1013	30
176	m0542	10.16									250.113		250.1130	30
177	m0543	1.31									251.031		251.0306 72.0814 84.0812 198.1120 216.1227 96.9285	30
178	m0544	8.01									251.128		251.1277 81.0705 93.0703 145.1010 163.1115 67.0550	30
179	m0547	9.36									252.094		252.0936 149.0121 247.0849 230.0982 156.0359 131.0014	30
180	m0548	3.84	InChI=1S/C12H16N2O4/c13-9(7-15)11(16)14-10(12(17)18)6-8-4-2-1-3-5-8/h1-5,9-10,15H,6-7,13H2,(H,14,16)(H,17,18)	PPQRSMGDOHLTBE-UHFFFAOYSA-N	21285384	METLIN	Ser-Phe	Polypeptide	C12H16N2O4	253.118	253.118	-2.37043	253.1177 120.0809 60.0452 166.0861 207.1127 103.0546	30			B
181	m0550	7.25									253.143		253.1434 121.0650 93.0704 81.0705 217.1222 105.0702	30
182	m0554	16.2									253.18		253.1797	30
183	m0563	1.9									256.082		256.0815 124.0400 57.0300 85.0300 80.0500	30
184	m0576	3.97									259.042		259.0423 213.0546 163.0389 135.0441 259.0563 115.0544	30
185	m0581	20.94									259.205		259.2054 119.0857 175.1479 133.1011 161.1323 105.0702	30
186	m0592	8.56									262.18		262.1801 176.1432 87.0447 118.0653 146.0961 132.0806	30
187	m0593	8.95									262.238		262.2375 200.2007 88.0762 70.0659 102.0916 176.1432	30
188	m0601	7.66									264.544		264.5442 146.9966 188.7338 116.9859 216.9307 97.0288	30
189	m0604	1.92	InChI=1S/C12H17N4OS/c1-8-11(3-4-17)18-7-16(8)6-10-5-14-9(2)15-12(10)13/h5,7,17H,3-4,6H2,1-2H3,(H2,13,14,15)/q+1	JZRWCGZRTZMZEH-UHFFFAOYSA-N	1130	METLIN	Thiamin	Vitamin	C12H16N4OS	265.112	265.112	-0.754399	265.1116 122.0714 144.0477 81.0453	30	Oryza sativa	Chen, W. et al., Nature Genetics (2014) 714-721	B
190	m0605	4.97									265.143		265.1430 120.0809 103.0546 119.0857 91.0547 105.0702	30
191	m0608	10.16									265.084		265.0836 81.0546 80.1030 173.6442 138.2244 125.9302	30
192	m0613	6.35									266.161		266.1610 136.0618 234.1348 137.0457	30
193	m0614	4.22	InChI=1S/C13H18N2O4/c1-8(16)11(14)12(17)15-10(13(18)19)7-9-5-3-2-4-6-9/h2-6,8,10-11,16H,7,14H2,1H3,(H,15,17)(H,18,19)	IQHUITKNHOKGFC-UHFFFAOYSA-N	4099799	METLIN	Thr-Phe	Polypeptide	C13H18N2O4	267.134	267.134	0.374344	267.1340 74.0607 120.0809 166.0861 56.0504	30			B
194	m0616	9									267.12		267.1201 81.0705 105.0700	30
195	m0621	2.44	InChI=1S/C10H13N5O4/c11-8-5-9(13-2-12-8)15(3-14-5)10-7(18)6(17)4(1-16)19-10/h2-4,6-7,10,16-18H,1H2,(H2,11,12,13)/t4-,6-,7-,10-/m1/s1	OIRDTQYFTABQOQ-KQYNXXCUSA-N	60961	KNApSAcK	Adenosine	Nucleoside	C10H13N5O4	268.104	268.104	-0.745979	268.1038 136.0617 119.0351	30	Zea mays	Suzuki, R. et al., Chemical and Pharmaceutical Bulletin (2007) 153-155	A
196	m0626	7.61									271.101		271.1013 135.0437 98.9755 107.0857 116.9857 81.0702	30
197	m0627	10.44	InChI=1S/C15H10O5/c16-9-3-1-8(2-4-9)13-7-12(19)15-11(18)5-10(17)6-14(15)20-13/h1-7,16-18H	KZNIFHPLKGYRTM-UHFFFAOYSA-N	5280443	MassBank	Apigenin	Flavonoid	C15H10O5	271.06	271.06	-1.10677	271.0598 153.0182 119.0493 91.0547	30			A
198	m0630	14.02									271.144		271.1440 227.1177 255.1125 108.0813 168.0808 199.0860	30
199	m0633	1.92									272.113		272.1126 110.0603 92.0500 85.0290 69.0342 61.0291	30
200	m0638	5.89									273.179		273.1792 229.1628 81.0706 255.1702 219.1492 211.1522	30
201	m0640	10.13									273.076		273.0756 137.0233 81.0341 105.0702 91.0546	30
202	m0641	10.58									273.185		273.1847 255.1742 105.0702 91.0547 157.1014 79.0547	30
203	m0642	10.54	InChI=1S/C15H12O5/c16-9-3-1-8(2-4-9)13-7-12(19)15-11(18)5-10(17)6-14(15)20-13/h1-6,13,16-18H,7H2/t13-/m0/s1	FTVWIRXFELQLPI-ZDUSSCGKSA-N	439246	MassBank	Naringenin	Flavonoid	C15H12O5	273.076	273.076	-0.366199	273.0756 153.0182 147.0440 119.0493 91.0548	30			A
204	m0645	13.48									273.148		273.1484 151.0389 167.0338 67.0551 55.0550	30
205	m0647	16.54									273.221		273.2212 91.0547 119.0858 105.0701 81.0704 67.0548	30
206	m0649	1.44									274.176		274.1760 187.0368 70.0659 85.0289 69.0343 72.0815	30
207	m0650	1.92									274.176		274.1758 100.1124 69.0706 147.0763 70.0658	30
208	m0651	13									274.274		274.2737 70.0659 88.0762 57.0707 106.0866	30
209	m0666	20.62	InChI=1S/C18H30O2/c1-2-3-4-5-6-7-8-9-10-11-12-13-14-15-16-17-18(19)20/h3-4,6-7,9-10H,2,5,8,11-17H2,1H3,(H,19,20)/b4-3-,7-6-,10-9-	DTOSIQBPPRVQHS-PDBXOOCHSA-N	5280934	HMDB	Linolenic acid	Fatty Acids	C18H30O2	279.232	279.232	-0.358125	279.2318 81.0705 67.0550 95.0859 109.1014 149.0232	30	Zea mays	Yang, X. et al., Theoretical and Applied Genetics (2010) 665-678	C
210	m0670	11.9									281.174		281.1744 79.0548 67.0550 93.0703 91.0547 81.0705	30
211	m0672	20.02	InChI=1S/C18H32O2/c1-2-3-4-5-6-7-8-9-10-11-12-13-14-15-16-17-18(19)20/h6-7,9-10H,2-5,8,11-17H2,1H3,(H,19,20)/b7-6-,10-9-	OYHQOLUKZRVURQ-HZJYTTRNSA-N	5280450	HMDB	Linoleic acid	Fatty Acids	C18H32O2	281.248	281.247	-0.711117	281.2473 81.0705 55.0550 67.0549 245.2262 95.0860	30			A
212	m0675	2.06									282.133		282.1332 107.0495 176.0917 140.0705 97.0288 95.0496	30
213	m0676	4.1									282.119		282.1194 150.0773 136.0617 250.1297 94.0403	30
214	m0677	6.92									282.206		282.2062 238.1798 152.1433 87.0446 166.0861	30
215	m0678	21.62									282.279		282.2788 69.0705 83.0861 55.0550 95.0856 57.0707	30
216	m0682	7.38									283.717		283.7174 114.0916 96.0812 69.0707 113.1077 79.0549	30
217	m0684	15.47									283.205		283.2054 105.0701 121.1014 145.1016 173.1320 81.0704	30
218	m0687	1.96	InChI=1S/C10H13N5O5/c11-10-13-7-4(8(19)14-10)12-2-15(7)9-6(18)5(17)3(1-16)20-9/h2-3,5-6,9,16-18H,1H2,(H3,11,13,14,19)/t3-,5-,6-,9-/m1/s1	NYHBQMYGNKIUIF-UUOKFMHZSA-N	135398635	Massbank	Guanosine	Nucleoside	C10H13N5O5	284.099	284.098	-1.75995	284.0984 152.0565 135.0301 110.0351	30			A
219	m0693	10.26									285.17		285.1695 81.0705 147.1168 105.0702 119.0857 67.0550	30
220	m0694	10.49									285.169		285.1694 81.0705 147.1168 105.0702 67.0550 79.0549	30
221	m0698	1.92									286.128		286.1280 124.0758 106.0655 123.0442 124.0394 164.0917	30
222	m0709	9.46	InChI=1S/C15H10O6/c16-8-4-11(19)15-12(20)6-13(21-14(15)5-8)7-1-2-9(17)10(18)3-7/h1-6,16-19H	IQPNAANSBPBGFQ-UHFFFAOYSA-N	5280445	MassBank	Luteolin	Flavonoid	C15H10O6	287.055	287.055	-1.0451	287.0547 153.0181 135.0440 117.0335 241.0488	30	Mulberry	Zheng, J. et al., Chinese Journal of Modern Applied Pharmacy (2014) 218-221	A
223	m0710	11.82									287.091		287.0912 259.0967 137.0596 199.0754 241.0492 227.0699	30
224	m0711	1.92									288.203		288.2028 70.0659 126.0550 175.1189 116.0708 86.0970	30
225	m0712	13.5									288.235		288.2351 88.0762 242.2473 74.0608	30
226	m0715	6.48									289.18		289.1796 93.0700 121.0700 217.1200 81.0700 105.0700	30
227	m0723	17.02									289.22		289.2200 105.0700 91.0500 119.0900 133.1000 147.1200	30
228	m0726	5.93									290.087		290.0875 272.1853 91.0547 228.1593 210.1486 246.1697	30
229	m0728	13.23	InChI=1S/C16H35NO3/c1-2-3-4-5-6-7-8-9-10-11-12-15(19)16(20)14(17)13-18/h14-16,18-20H,2-13,17H2,1H3/t14-,15+,16-/m0/s1	OCHZTELGZBWSJD-XHSDSOJGSA-N	11312307		2-Amino-1,3,4-hexadecanetriol	Others	C16H35NO3	290.269	290.269	-1.03352	290.2687 88.0762 242.2748 118.0986 74.0607 56.0503	30	Zea mays	Wen, W. et al., Nature Communications (2014) 3438-3447	D
230	m0729	1.45									291.084		291.0838 70.0659 118.0866 246.9467	30
231	m0734	15.51									291.195		291.1951 107.0494 149.0961 91.0547 81.0340 79.0549	30
232	m0738	2.48									292.139		292.1389 130.0863 84.0450 112.0759 85.0290 69.0706	30
233	m0739	7.87									292.19		292.1903 118.0653 162.0912 230.1538 92.0500 132.0807	30
234	m0740	1.4									293.063		293.0630 91.9588 263.1101	30
235	m0757	1.31					1,4-dideoxy-1,4-imino-D-arabinitol O-hexoside	Alkaloid	C11H12NO8	296.064	296.066	7.43084	296.0658 104.1074 134.0812	30	Mulberry	Zhang, N. et al., Analytical Methods (2013) 2445-2460	B
236	m0759	9.63									297.112		297.1118 147.0439 91.0547 119.0492 161.0233	30
237	m0761	18.94	InChI=1S/C18H32O3/c1-2-3-4-5-6-7-8-9-10-11-12-13-14-15-16-17(19)18(20)21/h6-7,9-10,17,19H,2-5,8,11-16H2,1H3,(H,20,21)/b7-6-,10-9-	AFDSETGKYZMEEA-HZJYTTRNSA-N	21158511	METLIN	Hydroxylinoleic acid	Fatty Acids	C18H32O3	297.242	297.241	-3.02783	297.2415 67.0550 69.0706 81.0705 279.2321 55.0551	30	Zea mays	Wen, W. et al., Nature Communications (2014) 3438-3447	D
238	m0765	5.21	InChI=1S/C11H15N5O3S/c1-20-2-5-7(17)8(18)11(19-5)16-4-15-6-9(12)13-3-14-10(6)16/h3-5,7-8,11,17-18H,2H2,1H3,(H2,12,13,14)/t5-,7-,8-,11-/m1/s1	WUUGFSXJNOTRMR-IOSLPCCCSA-N	439176	METLIN	5-Methylthioadenosine	Nucleoside	C11H15N5O3S	298.097	298.096	-1.67731	298.0963 136.0617 61.0115 75.0270	30	Zea mays	Wen, W. et al., Nature Communications (2014) 3438-3447	B
239	m0766	9.44									298.274		298.2738 262.2526 280.2635 96.0812 94.0656 108.0811	30
240	m0767	10.4									298.165		298.1646 220.1331 107.0493 256.1537 91.0546 67.0549	30
241	m0771	16.39									299.258		299.2577 81.0703 71.0862 57.0707 95.0859 69.0704	30
242	m0776	9.06									300.18		300.1805 250.1435 193.1220 122.0604 136.0757 91.0547	30
243	m0778	3.98									301.126		301.1258 139.0388 70.0657 84.0814 111.0441	30
244	m0781	6.87									301.165		301.1646 273.0389 245.0446 217.0488 79.0549 93.0703 67.0550	30
245	m0783	10.73	InChI=1S/C16H12O6/c1-21-14-4-8(2-3-10(14)18)13-7-12(20)16-11(19)5-9(17)6-15(16)22-13/h2-7,17-19H,1H3	SCZVLDHREVKTSH-UHFFFAOYSA-N	5280666	MassBank	Chrysoeriol	Flavonoid	C16H12O6	301.071	301.07	-3.98577	301.0695 286.0465 258.0523	30	Mulberry	Lee, J. S. et al., Molecules (2014) 8904-8915	B
246	m0787	5.66				METLIN	Leu-Ala-Val	Polypeptide	C14H27N4O4	302.207	302.207	-0.330899	302.2073 72.0815 143.1178 86.0970 171.1127 157.1335 185.1280	30			B
247	m0788	5.85									302.123		302.1233 182.0812 85.0289 97.0288 140.0704 108.0811 164.0704	30
248	m0789	8.33									302.565		302.5647 114.0916 96.0813 209.1648	30
249	m0790	9.73									302.073		302.0728	30
250	m0797-1	7.42	InChI=1S/C15H10O7/c16-7-4-10(19)12-11(5-7)22-15(14(21)13(12)20)6-1-2-8(17)9(18)3-6/h1-5,16-19,21H	REFJWTPEDVJJIY-UHFFFAOYSA-N	5280343	MassBank	Quercetin	Flavonoid	C15H10O7	303.05	303.05	-0.329979	303.0498 153.0182 257.0442 229.0493 137.0233	30			A
251	m0800	1.92									304.102		304.1022 72.0815 216.0865 142.1226 158.0810 112.0759	30
252	m0801	2.88									304.139		304.1391 124.0757 142.0861 96.0812 86.0969	30
253	m0804	2.95									305.121		305.1206 125.0791 86.0968 69.0339 117.0679 124.0755	30
254	m0805	4.48									305.159		305.1593 143.1066 125.0963 263.1131 85.0289 107.0859	30
255	m0806	7.69									305.149		305.1494 136.0757 164.0705 152.0706 124.0759 182.0813	30
256	m0812	4.22									307.168		307.1683 84.0814 84.0450 215.1390 247.1078 201.1021	30
257	m0813	6.32									307.128		307.1278 178.0862 265.1180 289.1179 247.1078 201.1021	30
258	m0817	10									309.112		309.1118 111.0443 239.0699 281.1170 83.0497 137.0233	30
259	m0826	1.28	InChI=1S/C12H23NO8/c14-3-5-11(6(16)1-2-13-5)21-12-10(19)9(18)8(17)7(4-15)20-12/h5-19H,1-4H2	SBRQYNWRPMAGGE-UHFFFAOYSA-N	354149		Fagomine O-hexoside-I	Alkaloid	C12H23NO8	310.15	310.15	0.322425	310.1497 148.0968 130.0863 86.0606 85.0290 112.0760	30	Mulberry	Zhang, N. et al., Analytical Methods (2013) 2445-2460	B
260	m0827	1.43					Fagomine O-hexoside-II	Alkaloid	C12H23NO8	310.15	310.15	0.14	310.1496 148.0967 130.0863 85.0290 86.0606 112.0759	30	Mulberry	Zhang, N. et al., Analytical Methods (2013) 2445-2460	B
261	m0828	6.3									310.165		310.1647 167.0576 152.0342 138.0549 94.0657 166.0499	30
262	m0829	8.22									310.165		310.1650 246.1489 122.0602 91.0548 292.1533 86.0606	30
263	m0838	1.37									312.166		312.1663 138.0549 70.0658 94.0654 110.0600	30
264	m0845	14.8									313.237		313.2368 295.2268 277.2157 67.0550 81.0341 93.0704	30
265	m0846	16.19									313.237		313.2370	30
266	m0847	16.51									313.237		313.2371	30
267	m0851	6.7									314.269		314.2685 296.2580 122.0965 278.2480 67.0550 96.0811	30
268	m0852	7.12									314.269		314.2686 278.2476 122.0965 67.0549 296.2585	30
269	m0860	7.82									316.284		316.2845 298.2739 280.2633 70.0659 67.0550 81.0705	30
270	m0861	8									316.284		316.2844 298.2737 280.2630 95.0860 67.0550 81.0705	30
271	m0862	14.3									316.284		316.2843 60.0452 298.2731 67.0549 280.2624 81.0705	30
272	m0867	8.95									317.138		317.1381 149.0597 167.0702 121.0649 93.0703 91.0547	30
273	m0868	9.5									317.138		317.1382 163.0752 181.0858 105.0702 299.1278 103.0545	30
274	m0869	11.62									317.138		317.1382 149.0596 167.0699 163.0752 121.0646 91.0546	30
275	m0870	11.78									317.138		317.1381 163.0751 181.0860 105.0700 79.0548 149.0595	30
276	m0871	13.86									317.211		317.2109 163.0751 181.0860 105.0700 79.0548	30
277	m0872	17.72									317.209		317.2085 133.9771 284.6394 183.7825 264.0099 180.1312	30
278	m0873	18.04									317.209		317.2086 178.9101 311.3810 278.9510 117.9971 125.6918	30
279	m0875	5.29									318.155		318.1546 156.1018 138.0912 110.0603 85.0289 69.0706	30
280	m0878	7.36									318.227		318.2273 81.0705 95.0860 93.0703 67.0550 79.0549	30
281	m0879	13.12									318.3		318.3000 256.2633 88.0762 70.0659 102.0918 57.0707	30
282	m0883	4.88									319.151		319.1511 277.1291 302.1245 231.0762 132.0444	30
283	m0886	1.53									320.097		320.0974 232.0811 218.0659 174.0764 260.0766 80.0501	30
284	m0887	4.41									320.17		320.1700 158.1175 95.0860 140.1068 97.0652 123.0807	30
285	m0889	1.21									321.993		321.9927 219.0198 298.9762 177.0092 256.9656	30
286	m0894	17.55									321.242		321.2423 123.0805 179.1429 109.0649 81.0705 95.0858	30
287	m0896	6.72									322.114		322.1140 100.0761 177.0401 205.0349 127.0577	30
288	m0899	18.24									322.274		322.2739 62.0608 81.0704 67.0549 107.0860 81.0704	30
289	m0901	4.73									323.073		323.0733 185.0421 161.0208 69.0342 85.0290 211.6936	30
290	m0902	7.12									323.16		323.1598 136.0756 164.0704 124.0757 182.0811 96.0814	30
291	m0903	16.02									323.221		323.2215 113.0599 95.0496 291.1955 85.0654 67.0550	30
292	m0905	18.11									323.221		323.2215 291.1955 55.0551 79.0548 69.0705 305.2107	30
293	m0908	19.53	InChI=1S/C20H37NO2/c1-2-3-4-5-6-7-8-9-10-11-12-13-14-15-16-17-20(23)21-18-19-22/h6-7,9-10,22H,2-5,8,11-19H2,1H3,(H,21,23)/b7-6-,10-9-	KQXDGUVSAAQARU-HZJYTTRNSA-N	5283446	METLIN	Linoleoyl Ethanolamide	Others	C20H37NO2	324.29	324.29	0.02	324.2897 62.0608 67.0550 81.0704 95.0858 109.1012	30	Homo sapiens	Palandra, J. et al., Journal of Chromatography B (2009) 2052-2060	B
294	m0911	4.93									325.092		325.0916 163.0388 107.0494 119.0493 91.0547 135.0440	30
295	m0914	12.15									325.107		325.1068 257.0437 310.0796 201.0545 137.0232 297.1117	30
296	m0915	15.38									325.143		325.1431 69.0707 269.0807 257.0805 256.0728 198.0676	30
297	m0916	15.96									325.143		325.1433 167.0338 269.0807 149.0233 131.0128	30
298	m0918	1.27	InChI=1S/C12H23NO9/c14-2-6-9(18)10(19)11(20)12(22-6)21-3-4-7(16)8(17)5(15)1-13-4/h4-20H,1-3H2/t4-,5+,6-,7-,8-,9+,10+,11-,12+/m1/s1	IIJOGKBFUDNUQI-QZNPSGCDSA-N	10245742		1-deoxynojirimycin O-hexoside-I	Alkaloid	C12H23NO9	326.145	326.144	-0.919837	326.1443 164.0917 261.0305 146.0811 128.0707 219.0199	30	Mulberry	Zhang, N. et al., Analytical Methods (2013) 2445-2460	B
299	m0918-1	1.46					1-deoxynojirimycin O-hexoside-II	Alkaloid	C12H23NO9	326.145	326.144	-0.919837	326.1443 164.0917 146.0811 128.0707 110.0603 80.0501	30	Mulberry	Zhang, N. et al., Analytical Methods (2013) 2445-2460	B
300	m0919	6.73									327.16		327.1597 137.0596 163.0752 103.0547 131.0491 133.0648	30
301	m0920	9.21									327.216		327.2164 125.0963 67.0550 291.1953 69.0707 309.2059	30
302	m0923	13									327.159		327.1588 135.0440 191.1065 149.0597 121.0650 81.0705	30
303	m0925	14.05									327.123		327.1227 217.0856 69.0706 173.0595 243.0654 68.9979	30
304	m0927	7.25									328.248		328.2479 250.2162 248.2368 268.2270 266.2476 96.0811	30
305	m0935	19.48									329.209		329.2085 91.9618 206.0377 198.6225	30
306	m0938	7.75									330.264		330.2636 312.2530 95.0860 81.0705 250.2529 252.2321	30
307	m0943	7.57									331.129		331.1286 215.0814 313.1186 229.0969 285.1230 257.0918	30
308	m0945	13.03									331.188		331.1878 92.1328 105.5606 189.2659	30
309	m0948	15.91									331.188		331.1876 278.9922 157.9614 263.4179	30
310	m0952	20.33									331.224		331.2241 91.9616 126.5845	30
311	m0953	20.51									331.224		331.2241 205.5751 284.5486 311.2460 131.9020 90.7020	30
312	m0954	1.43	InChI=1S/C14H21NO8/c1-6-10(18)8(3-16)7(2-15-6)5-22-14-13(21)12(20)11(19)9(4-17)23-14/h2,9,11-14,16-21H,3-5H2,1H3/t9-,11-,12+,13-,14?/m1/s1	MDLTWTOQCHCLSZ-GQYPCLOQSA-N	54066642	Massbank	Pyridoxine O-glucoside	Vitamin	C14H21NO8	332.134	332.134	-1.20433	332.1336 108.0811 152.0706 124.0758 314.1231 134.0601	30	Oryza sativa	Chen, W. et al., Nature Genetics (2014) 714-721	B
313	m0956	6.31									332.206		332.2064 314.1959 87.0446 86.0606 81.0705 149.0961	30
314	m0957	8.41									333.12		333.1198 149.0120 167.0226 252.0939 311.1250 228.0571	30
315	m0959	13.53									333.203		333.2032 263.1243 91.9589	30
316	m0962	14.3									333.203		333.2033 195.0990 97.4125	30
317	m0968	5									334.222		334.2218 93.0703 81.0705 316.2115 79.0550 91.0547	30
318	m0969	9.71									334.237		334.2372 272.2005 176.1068 118.0653 162.0913 190.1223	30
319	m0977	1.27					Nortropanoline O-hexoside-I	Alkaloid	C13H23NO9	338.145	338.144	-0.295731	338.1445 176.0920 140.0706 97.0289 158.0813 320.0134	30	Mulberry	Zhang, N. et al., Analytical Methods (2013) 2445-2460	B
320	m0977-1	1.42					Nortropanoline O-hexoside-II	Alkaloid	C13H23NO9	338.145	338.144	-0.295731	338.1445 320.0137 176.0917 158.0815 140.0704	30	Mulberry	Zhang, N. et al., Analytical Methods (2013) 2445-2460	B
321	m0980	15.96									339.123		339.1226 167.0338 149.0233 283.0600 131.0129	30
322	m0981	17.03									339.159		339.1589 283.0964 148.0517 135.0441 69.0705 191.1067	30
323	m0982	7.79									340.259		340.2591 114.0915 96.0812 69.0706 209.1647	30
324	m0986	5.09									341.086		341.0864 179.0336 123.0441 133.0284 151.0388	30
325	m0989	14.55									341.138		341.1381 167.0338 267.0649 205.0858 149.0233 131.0127	30
326	m0990	15.46									341.174		341.1744 135.0440 191.1065 163.0752 107.0494 79.0549	30
327	m0991	16.56									341.175		341.1748 149.0597 205.1223 119.0493 91.0547	30
328	m0995	5.89									343.175		343.1749 163.1117 85.0290 95.0496 107.0858 105.0702	30
329	m0996	15.29									343.227		343.2270 105.0703 95.0860 93.0705 95.0495 107.0858	30
330	m0998	15.92									343.226		343.2264 105.0702 95.0860 145.1012 67.0550	30
331	m1000	8.12									344.243		344.2428 326.2689 252.2321 308.2584 276.2323 81.0706 95.0860	30
332	m1001	8.9									344.279		344.2792 326.2685 81.0704 70.0658 95.0861 252.2303	30
333	m1002	9.11									344.279		344.2792 252.2320 326.2686 70.0659 81.0705 67.0550	30
334	m1005	4.47									345.152		345.1518	30
335	m1006	6.22									345.115		345.1153 301.1250 270.8669 241.0702 163.0571 100.0763	30
336	m1008	17.61									345.203		345.2034 110.5065 82.5355 103.2457 65.4479	30
337	m1009	18.54									345.203		345.2033 91.9622 303.9973	30
338	m1012	7.59									346.259		346.2585 328.2479 284.2218 81.0705 95.0860 67.0550	30
339	m1018	12.76									347.183		347.1826 309.5919 91.9619 224.4428 251.8237	30
340	m1019	16.09									347.219		347.2191 145.7777 115.2809	30
341	m1020	17.04									347.219		347.2189 82.4257 313.7001 127.4334	30
342	m1021	17.24									347.219		347.2190 192.0028 226.2310	30
343	m1022	17.39									347.219		347.2189 91.9593	30
344	m1025	5.94									348.133		348.1327 98.0603 87.0445 138.0546 252.1584	30
345	m1030	19.24									349.273		349.2734 123.0806 293.2110 109.0651 179.1432 81.0705	30
346	m1031	1.91									350.181		350.1809 188.0916 142.1226 160.0971 85.0287 69.0341	30
347	m1032	5.61									350.109		350.1089	30
348	m1033	6.85									350.28		350.2800 70.0658 281.2218 238.1802 108.0808 72.0815	30
349	m1036	1.41									351.069		351.0687 107.9552 191.0038 75.3214 257.4138 213.1275	30
350	m1049	19.33									353.269		353.2687 81.0705 67.0550 93.0703 95.0859 261.2206	30
351	m1050	19.61									353.269		353.2687 81.0705 93.0703 67.0549 79.0548 95.0859	30
352	m1052	5.39	InChI=1S/C16H18O9/c1-22-9-4-7-2-3-12(18)23-8(7)5-10(9)24-16-15(21)14(20)13(19)11(6-17)25-16/h2-5,11,13-17,19-21H,6H2,1H3/t11-,13-,14+,15-,16-/m1/s1	SGTCGCCQZOUMJJ-YMILTQATSA-N	439514	METLIN	Scopolin	Others	C16H18O9	355.102	355.102	-0.844827	355.1021 193.0495 133.0284 178.0260 137.0596 122.0362	30	Mulberry	Li, X.U. Science of Sericulture (2008) 593-596	B
353	m1054	18.83									355.19		355.1900 149.0596 205.1222 119.0493 91.0547 81.0704	30
354	m1055	16.46	InChI=1S/C21H38O4/c1-2-3-4-5-6-7-8-9-10-11-12-13-14-15-16-17-21(24)25-19-20(23)18-22/h6-7,9-10,20,22-23H,2-5,8,11-19H2,1H3/b7-6-,10-9-/t20-/m0/s1	WECGLUPZRHILCT-GSNKCQISSA-N	6436630	METLIN	1-Linoleoyl Glycerol	Others	C21H38O4	355.284	355.284	0.844396	355.2839 67.0550 81.0705 95.0861 263.2361 245.2265 337.2721	30			B
355	m1057	17.2									355.268		355.2682 81.0704 67.0548 95.0858 263.2274 201.2779	30
356	m1058	20.55									355.284		355.2838 95.0857 81.0702 67.0548 55.0549 109.1016 245.2266 337.2794	30
357	m1059	20.88	InChI=1S/C21H38O4/c1-2-3-4-5-6-7-8-9-10-11-12-13-14-15-16-17-21(24)25-20(18-22)19-23/h6-7,9-10,20,22-23H,2-5,8,11-19H2,1H3/b7-6-,10-9-	IEPGNWMPIFDNSD-HZJYTTRNSA-N	5365676	METLIN	2-Linoleoyl Glycerol	Others	C21H38O4	355.284	355.284	0.562931	355.2838 81.0704 95.0860 67.0551 109.1014 263.2361 245.2257 337.2718	30			B
358	m1060	5.94									356.112		356.1121	30
359	m1061	7.98									357.133		357.1329 137.0598 307.0956 165.0548 321.1106 218.0726 339.1215	30
360	m1064	12.25									357.133		357.1329 203.0699 161.0235 147.0804 167.0334 91.0545	30
361	m1065	13.69									357.169		357.1693 163.0752 189.0908 147.0805 135.0811 103.0545	30
362	m1070	1.91									358.15		358.1497 150.0912 196.0967 178.0861 122.0601 92.0499	30
363	m1075	6.89									359.17		359.1696 197.1172 107.0858 133.1012 179.1070 93.0703	30
364	m1078	14.16									360.25		360.2504 120.7704 176.8063 64.0899	30
365	m1079	5.2									362.253		362.2533 344.2427 326.2321 79.0548 282.2061 81.0705	30
366	m1080	6.01									362.241		362.2411 344.2075 172.0972 211.1332 291.2088 146.0813	30
367	m1081	13.7									362.326		362.3261 300.2892 256.2631 70.0658 57.0706 146.1171	30
368	m1087	21.71									363.289		363.2889 179.1428 123.0807 109.0649 331.2617 286.7947	30
369	m1089	1.45									364.196		364.1962 202.1436 166.1225 142.1227 85.0289 69.0343	30
370	m1091	2.44									364.196		364.1961 202.1436 166.1224 138.1276 85.0290 69.0342	30
371	m1095	9.98									365.193		365.1932 136.0617 364.1974 81.0340 137.0461	30
372	m1097	17.57									365.268		365.2684 165.0911 347.2584 123.0805 152.0827 194.1298	30
373	m1098	17.95									365.268		365.2683 347.2570 165.0909 305.2466 319.2643 69.0706	30
374	m1099	3.67									366.212		366.2120 204.1592 85.0288 105.0702 71.0498 97.0285	30
375	m1100	5.17									366.284		366.2845 130.0651 144.0807 118.0651 172.0754 190.0862	30
376	m1102	5.98									366.285		366.2847 60.0453 95.0860 330.2625 348.2741 67.0548	30
377	m1106	11.8									368.243		368.2427 112.0759 128.1072 55.0550 60.0452 86.0968	30
378	m1107	2.45									369.998		369.9977 199.9764 181.9660 244.9743 137.0232 267.9665	30
379	m1114	1.91									370.207		370.2069 86.0970 132.1019 69.0706 110.0716	30
380	m1115	5.41									370.268		370.2679 72.0815 264.1596 352.2594 122.0601 236.1280	30
381	m1116	6.73									370.113		370.1129 152.0704 248.0910 81.0341 69.0342 140.0702	30
382	m1118	9.66									370.259		370.2585 292.2267 69.7060 189.1119 275.2007 79.0548	30
383	m1124	3.1									372.165		372.1649 164.1069 210.1123 85.0290 146.0963 105.0702	30
384	m1125	3.91									372.129		372.1286 106.0654 124.0758 85.0288 81.0340 69.0342	30
385	m1128	9.29									372.274		372.2742 312.2520 250.2527 95.0859 67.0548 156.1337	30
386	m1129	10.18									372.274		372.2741 55.0550 79.0548 81.0702 125.0961 67.0550	30
387	m1134	5.41									373.244		373.2441 100.1124 69.0705 84.0450 72.0816	30
388	m1135	7.89									373.222		373.2216 109.1014 135.1167 95.0861 193.1586 107.0857	30
389	m1136	8.26									373.222		373.2218 109.1014 135.1167 95.0860 211.1690 193.1589	30
390	m1141	5.28									375.128		375.1285 84.0449 130.0498 147.0763	30
391	m1143	8.57									375.165		375.1647 93.0702 121.0649 81.0703 147.1169 217.1221	30
392	m1144	19.59									375.268		375.2678	30
393	m1147	5.96	InChI=1S/C17H20N4O6/c1-7-3-9-10(4-8(7)2)21(5-11(23)14(25)12(24)6-22)15-13(18-9)16(26)20-17(27)19-15/h3-4,11-12,14,22-25H,5-6H2,1-2H3,(H,20,26,27)/t11-,12+,14-/m0/s1	AUNGANRZJHBGPY-SCRDCRAPSA-N	493570	Massbank	Vitamin B2	Vitamin	C17H20N4O6	377.146	377.145	-1.0606	377.1452 243.0873 172.0868 216.0767 69.0341 198.0661	30	Oryza sativa	Chen, W. et al., Nature Genetics (2014) 714-721	B
394	m1148	6.48									378.158		378.1577 138.0912 110.0966 95.0860 82.0657	30
395	m1151	1.92									380.191		380.1911 146.0811 308.1340 218.1387 85.0289 69.0342	30
396	m1152	1.38									381.079		381.0789 116.4255 81.0424 144.2749 264.1393	30
397	m1153	4.17									386.181		386.1806 224.1278 160.1119 178.1226 105.0701 85.0289	30
398	m1154	9.97									386.29		386.2897 252.2317 70.0660 81.0704 95.0859	30
399	m1156	4.95									387.126		387.1256 95.0496 153.0909 225.1482 343.1337	30
400	m1158	6.21									387.201		387.2010 95.0860 207.1379 149.0961 123.8060 67.0550	30
401	m1162	7.86									388.16		388.1597 85.0289 127.0387 87.0083 69.0341 81.0341	30
402	m1163	8.67									388.269		388.2690 172.1330 74.0608 154.1224 85.0527 72.0450	30
403	m1164	14.08									388.284		388.2842	30
404	m1167	5.19									389.216		389.2165 109.0650 86.0970 133.1012 227.1637 209.1635 72.0815	30
405	m1169	6.72									389.217		389.2166 209.1534 149.0961 125.0961 69.0342 191.1427	30
406	m1170	7.28									389.141		389.1414	30
407	m1171	4.38									390.139		390.1391 124.0758 142.0862 96.0811 79.0549 107.0495	30
408	m1173	6.89									390.212		390.2116 372.2020 97.1015 204.0872 55.0550 202.1067	30
409	m1174	7.61									390.212		390.2117 202.0704 372.1981 110.0604 93.0706 146.0812	30
410	m1175	7.12									391.197		391.1971	30
411	m1177	15.11									391.245		391.2451 149.0232 206.3720 255.0729 53.2420 117.7609	30
412	m1178	15.3									391.245		391.2450 149.0228 119.2038 103.8514 60.3044 53.3414	30
413	m1180	16.61									391.245		391.2452 339.1561 306.5112 149.0235 175.7993 133.7448 72.7004	30
414	m1181	4.68									392.227		392.2274 230.1749 194.1538 212.1640 85.0291 69.0343 166.1589	30
415	m1185	7.94									393.188		393.1879 349.1236 85.0291 136.0568 161.3067 182.2642	30
416	m1189	5.54									394.113		394.1128 146.0599 127.0391 69.0343 81.0341 109.0285	30
417	m1193	6.87									395.074		395.0736 327.0751 256.6004 91.9584 353.3102 86.1993	30
418	m1196	12.55									395.146		395.1462 259.0941 187.0361 240.5448 197.3801 94.9987	30
419	m1198	19.01									395.276		395.2765	30
420	m1199	8.11									396.801		396.8011 114.0915 96.0812 209.1645 113.1075	30
421	m1208	3.36									400.124		400.1238 238.0707 210.0759	30
422	m1209	4.79									400.197		400.1967 238.1434 120.0809 174.1276 192.1381	30
423	m1210	5.31									400.168		400.1684 131.0491 103.0546 132.0524 104.0579 85.0290	30
424	m1216	1.43									402.01		402.0105 247.9122 230.8858 94.9300 136.5544 194.5698	30
425	m1217	1.92									402.176		402.1757 107.0494 134.0811 240.1093 136.0616 296.1335	30
426	m1218	6.84									402.175		402.1755 154.0862 200.0916 67.0550 86.0605 109.1014	30
427	m1223	1.41									404.176		404.1763 62.0609 84.0814	30
428	m1224	1.92									404.155		404.1551 62.0609 60.0452	30
429	m1225	3.88									404.153		404.1527 287.1099 242.1003	30
430	m1229	4.46									405.137		405.1368 361.1465 319.1363	30
431	m1233	13.3									405.263		405.2633 91.0547 105.0702 131.0855 79.0548 129.0698	30
432	m1238	5.98									406.175		406.1749 259.1108 84.0450 388.2325 116.0166 81.0704	30
433	m1243	5.86									407.134		407.1336 107.0494 245.0806 123.0441 135.0440 161.0596	30
434	m1247	12.97									407.24		407.2403 255.4809 274.4769 321.1667 302.4716 79.0548	30
435	m1248	13.48									407.24		407.2401 291.4269 319.9572 248.9986 121.7082 101.1863	30
436	m1253	1.27									408.135		408.1354 246.0822 160.0455 258.0818 142.0350 102.0553	30
437	m1262	2.13									410.166		410.1657 230.1021 248.1126 85.0290 186.0759 69.0343	30
438	m1263	6.73									410.106		410.1056 366.1158 324.1049 230.0891	30
439	m1264	12.89									410.255		410.2548 186.0773 187.0851 214.1084 212.0930	30
440	m1265	1.51									411.069		411.0688 107.0495	30
441	m1267	6.25									411.199		411.1987 191.0813 147.0915 325.1390	30
442	m1269	8.96									412.269		412.2691 87.0446 104.0709 86.0606 291.1952 67.0550	30
443	m1270	9.96									412.269		412.2691 86.0606 174.1123 156.1018 87.0446 69.0343	30
444	m1271	4.64	InChI=1S/C15H20N6O8/c1-5(23)7(14(26)27)19-15(28)20-11-8-12(17-3-16-11)21(4-18-8)13-10(25)9(24)6(2-22)29-13/h3-7,9-10,13,22-25H,2H2,1H3,(H,26,27)(H2,16,17,19,20,28)/t5-,6-,7+,9-,10-,13-/m1/s1	UNUYMBPXEFMLNW-DWVDDHQFSA-N	161466	METLIN	Threonyl carbamoyl adenosine	Nucleic acid derivative	C15H20N6O8	413.142	413.142	0.09	413.1415 136.0617 162.0409 281.0989	30	Oryza sativa	Chen, W. et al., Nature Genetics (2014) 714-721	B
445	m1275	1.92									414.233		414.2333 86.0970 132.1019	30
446	m1276	4.21									414.139		414.1394 222.0759 270.0969 109.0287 194.0811 252.0865	30
447	m1280	15.01									415.321		415.3212 119.0856 91.0547 117.0700	30
448	m1281	5.07									417.234		417.2342 86.0969 72.0815 129.1022 261.1441 270.1808	30
449	m1283	1.92									418.134		418.1341 123.0441 134.0811 136.0617 85.0290 124.0394	30
450	m1284	2.13									418.134		418.1341 108.0811 152.0705 124.0758 106.0654 134.0600	30
451	m1285	2.99									418.207		418.2072 120.0810 166.0862 103.0546 107.0495	30
452	m1286	6.08									418.207		418.2066 98.0604 87.0445 104.0709 70.0658 86.0969	30
453	m1288	7.65									418.124		418.1241 169.0759 195.0551 155.0602 313.0814 225.0655	30
454	m1291	7.29									419.191		419.1910 85.0290 81.0341 153.1272 69.0342 95.0860	30
455	m1292	7.82									419.17		419.1696 330.1093 167.0700 208.0513 181.0494 79.0549	30
456	m1293	15.39									419.279		419.2788 91.0547 93.0704 129.0699 79.0549 131.0854	30
457	m1296	1.92									420.161		420.1614 121.0649 112.0507 138.0912 93.0703	30
458	m1298	6.47									420.223		420.2226 204.0865 200.0916 158.0811 202.1072	30
459	m1307	6.07									422.108		422.1077 124.0394 137.0232 106.0290 268.0811 78.0344	30
460	m1310	5.8									423.179		423.1792 293.1162 120.0809 149.0743 72.0815 102.0375	30
461	m1311	7.43									423.089		423.0895 379.0998 120.0809 86.0969 337.0889	30
462	m1312	8.09									423.761		423.7606 114.0915 96.0812 414.7556 69.0706 358.2134	30
463	m1313	16.51									423.274		423.2737 79.0548 93.0703 67.0549 81.0705 97.0288	30
464	m1314	17.16									423.274		423.2735 81.0705 93.0703 79.0548 91.0547 105.0701	30
465	m1315	17.92									423.31		423.3101 179.1429 123.0805 109.0651 331.2626 95.0859	30
466	m1316	18.18									423.31		423.3100 123.0805 331.2625 179.1428 135.0803 95.0860	30
467	m1320	10.78									425.178		425.1780 289.0529 287.0371 107.0857 79.0548	30
468	m1321	19.8									425.214		425.2141 365.1935 281.1353 174.0538	30
469	m1324	5.35	InChI=1S/C16H22N6O8/c1-6(24)8(15(27)28)20-16(29)21(2)12-9-13(18-4-17-12)22(5-19-9)14-11(26)10(25)7(3-23)30-14/h4-8,10-11,14,23-26H,3H2,1-2H3,(H,20,29)(H,27,28)/t6-,7-,8+,10-,11-,14-/m1/s1	PEDOATWRBUGMHU-KQSSXJRRSA-N	193795		(2S,3R)-2-{[{9-[(2R,3R,4S,5R)-3,4-Dihydroxy-5-(hydroxymethyl)tetrahydro-2-furanyl]-9H-purin-6-yl}(methyl)carbamoyl]amino}-3-hydroxybutanoic acid (non-preferred name)	Others	C16H22N6O8	427.157	427.157	0.468212	427.1574 150.0773 295.1147	30	Zea mays	Wen, W. et al., Nature Communications (2014) 3438-3447	B
470	m1325	6.07									427.173		427.1725 179.0337 70.0658 85.0290 81.034	30
471	m1330	4.1									429.15		429.1502 110.0603 162.0548 88.0398 190.0497 267.0972	30
472	m1333	10.39									429.139		429.1390 163.0751 181.0857 105.0702 103.0545 79.0548	30
473	m1334	2.1									430.157		430.1568 136.0617 268.0814 86.0970	30
474	m1335	4.88									430.266		430.2658 84.0813 129.1022 70.0658 86.0969 72.0814	30
475	m1344	1.44									432.171		432.1711 107.0495 90.0555 164.0917 123.0442 326.1444	30
476	m1345	1.92									432.186		432.1862 107.0494 164.0916 326.1441 123.0441 146.0810	30
477	m1346	7.74									432.129		432.1287 147.0439 124.0394 119.0493 106.0290 268.0812	30
478	m1347	3.69									433.168		433.1679 377.1391 98.9847 228.0874 275.3702	30
479	m1348	7.9	InChI=1S/C21H20O10/c22-8-16-18(26)19(27)20(28)21(31-16)29-11-5-12(24)17-13(25)7-14(30-15(17)6-11)9-1-3-10(23)4-2-9/h1-7,16,18-24,26-28H,8H2/t16-,18-,19+,20-,21-/m1/s1	KMOUJOKENFFTPU-QNDFHXLGSA-N	5280704	MassBank	Apigenin 7-O-glucoside	Flavonoid	C21H20O10	433.113	433.113	-0.461773	433.1127 271.0597 153.0181 119.0493	30			A
480	m1351	6.83									434.202		434.2019 85.0289 97.0288 69.0342 73.0291 115.0391	30
481	m1353	1.92									435.197		435.1965 255.1337 141.0657 225.1232 111.0555 85.0290	30
482	m1355	9.31									435.126		435.1259 391.1360 91.0545 85.0288	30
483	m1356	9.96									435.214		435.2138 79.0549 93.0704 67.0550 91.0547 105.0702	30
484	m1361	5.91									436.124		436.1236 124.0394 106.0290 268.0813 78.0345	30
485	m1364	21.68									436.339		436.3392 110.2272	30
486	m1367	14.3									437.193		437.1930	30
487	m1369	1.31									438.992		438.9919 208.9724 242.9666 202.8905 133.0346 94.9301	30
488	m1371	10.86									438.285		438.2847 213.0994 67.0550 252.1229 79.0549 81.0705	30
489	m1374	5.35									439.157		439.1574 120.0809 110.0715 136.0756 72.0814 69.0342	30
490	m1375	6.83									439.157		439.1572 131.0855 191.1431 81.0703 119.0854 173.1317	30
491	m1377	8.58									439.196		439.1959 133.1012 137.0960 191.1429 107.0858 105.0702	30
492	m1380	5.7									440.148		440.1483 422.1376 146.0600 241.0968 174.0549 301.1180	30
493	m1385	5.94									441.116		441.1156 91.0547 98.9758 70.0659 116.9860 237.0277	30
494	m1386	6.29									441.103		441.1025 193.0495 133.0284 178.0260 137.0596	30
495	m1387	7.6									441.173		441.1729 397.1830 289.0527 355.1720	30
496	m1388	5.14									442.178		442.1777 84.0449 70.0658 270.0970 144.0656 145.0493	30
497	m1391	19.47									442.316		442.3158 84.0449 126.0550 71.0863 186.0759	30
498	m1393	3.27									443.159		443.1593 123.0791 122.0714 281.1063 81.0453	30
499	m1394	4.83									443.202		443.2022 147.0915 281.1492 69.0342	30
500	m1398	2.88									444.172		444.1723 136.0617 85.0290 69.0342 282.1196	30
501	m1400	7.14									445.17		445.1703 197.1171 133.1012 107.0858 179.1065 85.0290	30
502	m1401	7.26									445.327		445.3269 134.0811 252.2319 427.3165 197.1171	30
503	m1403	13.3									445.256		445.2557 137.0596 81.0704	30
504	m1410	9.07									447.222		447.2222 81.0705 147.1167 85.0290 61.0292 105.0702	30
505	m1413	1.92									448.181		448.1810 123.0441 164.0917 84.0813 136.0617	30
506	m1414	2.96									448.217		448.2174 120.0809 166.0862	30
507	m1415	4.44									448.194		448.1936 259.1187 132.0444 302.1244 120.0445 202.0973	30
508	m1416	5.65									448.181		448.1811 107.0494 154.0497	30
509	m1417	10.69									448.305		448.3052 190.1224 176.1069 162.0912 368.2583 146.0962	30
510	m1421	7.2	InChI=1S/C21H20O11/c22-7-16-18(27)19(28)20(29)21(32-16)30-9-4-12(25)17-13(26)6-14(31-15(17)5-9)8-1-2-10(23)11(24)3-8/h1-6,16,18-25,27-29H,7H2/t16-,18-,19+,20-,21-/m1/s1	PEFNSGRTCBGNAN-QNDFHXLGSA-N	5280637	MassBank	Luteolin 7-O-glucoside	Flavonoid	C21H20O11	449.108	449.108	-0.0667991	449.1075 287.0547 153.0181 135.0440	30	Oryza sativa	Chen, W. et al., Nature Genetics (2014) 714-721	A
511	m1423	7.65	InChI=1S/C21H20O11/c22-7-13-15(26)17(28)18(29)21(31-13)32-20-16(27)14-11(25)5-10(24)6-12(14)30-19(20)8-1-3-9(23)4-2-8/h1-6,13,15,17-18,21-26,28-29H,7H2/t13-,15-,17+,18-,21+/m1/s1	JPUKWEQWGBDDQB-QSOFNFLRSA-N	5282102	MassBank	Kaempferol 3-O-glucoside	Flavonoid	C21H20O11	449.108	449.107	-1.11332	449.1073 287.0544 85.0289 153.0180	30	Oryza sativa	Chen, W. et al., Nature Genetics (2014) 714-721	A
512	m1424	1.43									451.048		451.0483 84.0812 130.0863 281.4609 247.8175	30
513	m1426	1.45									452.095		452.0954 255.6790 317.0236 174.7083 130.0863 407.6230	30
514	m1432	3									457.111		457.1107 120.0808 317.0846 327.7896	30
515	m1433	6.93									457.207		457.2065 133.1011 81.0704 109.0650 91.0547 191.1428	30
516	m1434	7.65									457.24		457.2404 98.9756 116.9859 134.9962	30
517	m1435	7.89									457.241		457.2406 277.1777 98.9758 91.9618	30
518	m1436	8.24									457.207		457.2065 209.1534 165.1273 121.1012 85.0290 151.1116	30
519	m1437	8.36									457.206		457.2060 133.1010 137.0959 209.1533 107.0857 121.1011	30
520	m1443	1.92									460.181		460.1812 72.0815 118.0862 133.8393 55.0549	30
521	m1444	8.11									460.326		460.3264 298.2736 280.2631 262.2526 96.0812	30
522	m1446	7.48									462.348		462.3484	30
523	m1447	8.65	InChI=1S/C24H47NO7/c1-2-3-4-5-6-7-8-9-10-11-12-13-14-15-19(27)18(25)17-31-24-23(30)22(29)21(28)20(16-26)32-24/h14-15,18-24,26-30H,2-13,16-17,25H2,1H3/b15-14+/t18-,19+,20+,21-,22-,23+,24+/m0/s1	HHJTWTPUPVQKNA-PIIMIWFASA-N	5280458	METLIN	Psychosine	Others	C24H47NO7	462.342	462.342	-1.51403	462.3418 300.2892 264.2683 282.2788 70.0658	30	Homo sapiens	Vaccaro, A. M. et al., European journal of biochemistry (1985) 315-321	B
524	m1448	8.8	InChI=1S/C24H47NO7/c1-2-3-4-5-6-7-8-9-10-11-12-13-14-15-19(27)18(25)17-31-24-23(30)22(29)21(28)20(16-26)32-24/h14-15,18-24,26-30H,2-13,16-17,25H2,1H3/b15-14+/t18-,19+,20+,21+,22-,23+,24+/m0/s1	HHJTWTPUPVQKNA-JIAPQYILSA-N	5280570	METLIN	Glucosylsphingosine	Others	C24H47NO7	462.342	462.342	-1.08145	462.3420 300.2893 264.2681 282.2786 85.0289 69.0342	30	Homo sapiens	Vaccaro, A. M. et al., European journal of biochemistry (1985) 315-321	B
525	m1449	13.8									463.284		463.2836	30
526	m1450	17.92									463.303		463.3027	30
527	m1451	18.18									463.303		463.3027	30
528	m1452	8.11	InChI=1S/C22H22O11/c1-30-15-4-9(2-3-11(15)24)14-7-13(26)18-12(25)5-10(6-16(18)32-14)31-22-21(29)20(28)19(27)17(8-23)33-22/h2-7,17,19-25,27-29H,8H2,1H3/t17-,19-,20+,21-,22-/m1/s1	GAMYVSCDDLXAQW-MIUGBVLSSA-N	11294177	METLIN	Chrysoeriol 7-O-glucoside	Flavonoid	C22H22O11	463.123	463.122	-3.23888	463.1220 301.0697 286.0463 258.0521	30	Mulberry	Lee, J. S. et al., Molecules (2014) 8904-8915	B
529	m1464	7.11	InChI=1S/C21H20O12/c22-6-13-15(27)17(29)18(30)21(32-13)33-20-16(28)14-11(26)4-8(23)5-12(14)31-19(20)7-1-2-9(24)10(25)3-7/h1-5,13,15,17-18,21-27,29-30H,6H2/t13-,15-,17+,18-,21+/m1/s1	OVSQVDMCBVZWGM-QSOFNFLRSA-N	5280804	METLIN	Quercetin 3-O-glucoside	Flavonoid	C21H20O12	465.103	465.103	-0.645019	465.1025 303.0495 85.0289 153.0181 229.0493 137.0232	30	Mulberry	Ju, W. T. et al., Journal of food science and technology (2018) 1789-1796	A
530	m1468	7.25									468.244		468.2439	30
531	m1474	5.55									469.131		469.1313 123.0441 185.0419 145.0258 307.0781	30
532	m1475	6.47									469.132		469.1316 71.0498 81.0705 79.0548 253.2162 95.0859	30
533	m1476	6.91									469.132		469.1315 181.0857 148.0515 425.1422	30
534	m1477	7.19									469.182		469.1815 191.0812 307.1286 325.1384 81.0340 147.0915	30
535	m1485	6.1									473.203		473.2031 98.9756 473.2017 163.1115 116.9859 147.1166	30
536	m1486	6.92									473.202		473.2023 70.0658 146.0599 118.0653 136.0756 95.0860	30
537	m1492	3.82									474.183		474.1830 180.0878 110.0351 153.0409 78.5125 235.4401	30
538	m1493	6.83									475.325		475.3251 85.0288 209.1539 259.1292 107.0858 191.1432	30
539	m1497	6.5									476.322		476.3215 314.2685 278.2475 296.2580 85.0289 69.0342	30
540	m1498	7.74									476.322		476.3215 314.2685 296.2579 278.2474 85.0289 250.2526	30
541	m1509	7.32									478.337		478.3370 316.2841 298.2735 280.2631 85.0289	30
542	m1514	7.58									479.191		479.1907	30
543	m1517	8.96									479.191		479.1912	30
544	m1518	9.49									479.191		479.1908	30
545	m1519	11.28									479.249		479.2486 269.1231 251.1124 287.1335 239.1124 243.1436	30
546	m1521	6.03									480.211		480.2112	30
547	m1522	6.21									480.211		480.2110	30
548	m1523	6.7									480.28		480.2799 318.2259 97.0287 69.0342 145.1008 163.0385	30
549	m1524	7.87									481.204		481.2040	30
550	m1525	8.05									481.168		481.1676 317.0854 266.0360 151.6032 137.0200 79.8882	30
551	m1529	15.5									481.295		481.2945	30
552	m1532	1.36									482.03		482.0303 139.9145 381.0787 85.0288	30
553	m1536	4.23									483.111		483.1109	30
554	m1537	6.43									483.147		483.1472	30
555	m1539	8.95									483.147		483.1469 335.1457 275.1248 215.0701	30
556	m1541	1.92									484.166		484.1658	30
557	m1542	7.1									484.076		484.0758	30
558	m1548	14.6									485.302		485.3020	30
559	m1549	15.14									485.302		485.3020	30
560	m1553	1.43									487.121		487.1208 70.0657 84.0813	30
561	m1554	1.91									487.178		487.1779 112.0508 244.0924 341.4161	30
562	m1555	5.48									487.192		487.1919 147.0915 191.0812 325.1389 193.0493 281.1490	30
563	m1556	5.68									487.192		487.1920 191.0813 325.1389 307.1285 173.0708 69.0342	30
564	m1558	9.07									487.215		487.2149 443.2249	30
565	m1559	9.37									487.215		487.2148 443.2241	30
566	m1562	14.49									487.341		487.3414	30
567	m1563	14.71									487.341		487.3414	30
568	m1565	19.29									487.303		487.3026	30
569	m1566	20.62									487.222		487.2216 162.8557 243.9085 264.3291 358.5556 53.2723	30
570	m1567	1.4	InChI=1S/C18H33NO14/c20-2-7-11(25)12(26)14(28)18(31-7)33-16-8(3-21)32-17(15(29)13(16)27)30-4-5-9(23)10(24)6(22)1-19-5/h5-29H,1-4H2/t5-,6+,7-,8-,9-,10-,11-,12+,13-,14-,15-,16-,17-,18+/m1/s1	ROGRFDXUUCGUMJ-DTDKMRPHSA-N	101939181		1-deoxynojirimycin di O-hexoside	Alkaloid	C18H33NO14	488.197	488.197	-0.04	488.1974 164.0916 85.0289 69.0342 146.0811	30	Mulberry	Zhang, N. et al., Analytical Methods (2013) 2445-2460	B
571	m1572	9.77									489.321		489.3206 165.0909 137.0962 109.1014 67.0549 81.0705	30
572	m1575	6.54									490.301		490.3008 328.2478 250.2165 248.2368 310.2368 85.0290	30
573	m1576	7.42									490.207		490.2068 472.1962 174.0761 197.0592 173.0597	30
574	m1579	8.54					Kaempferol derivative	Flavonoid			491.118		491.1180 287.0545 81.0340 69.0343 121.0285 153.0179	30			B
575	m1580	9.1									491.336		491.3362	30
576	m1586	9.52									493.168		493.1676 431.1675 151.0748	30
577	m1587	1.91	InChI=1S/C20H31NO13/c1-7-12(25)9(3-22)8(2-21-7)6-31-19-17(30)15(28)18(11(5-24)33-19)34-20-16(29)14(27)13(26)10(4-23)32-20/h2,10-11,13-20,22-30H,3-6H2,1H3/t10-,11-,13-,14+,15-,16-,17-,18-,19-,20+/m1/s1	JBPUGXTYHUSDKT-ORYXFIOKSA-N	195172		Pyridoxine di-O-hexosyl	Vitamin	C20H31NO13	494.187	494.186	-1.21412	494.1862 108.0810 152.0704 170.0810 134.0600 332.1333	30	Oryza sativa	Chen, W. et al., Nature Genetics (2014) 714-721	B
578	m1594	15.51									495.274		495.2738	30
579	m1595	8.29									496.347		496.3470	30
580	m1596	17.52	InChI=1S/C24H50NO7P/c1-5-6-7-8-9-10-11-12-13-14-15-16-17-18-24(27)30-21-23(26)22-32-33(28,29)31-20-19-25(2,3)4/h23,26H,5-22H2,1-4H3/t23-/m1/s1	ASWBNKHCZGQVJV-HSZRJFAPSA-N	460602	METLIN	LPC(1-acyl 16:0)-Ⅰ	Lysophosphatide	C24H50NO7P	496.34	496.339	-1.41032	496.3391 184.0729 86.0968 124.9996 98.9845 60.0814	30	Oryza sativa	Chen, W. et al., Nature Genetics (2014) 714-721	B
581	m1597	17.96	InChI=1S/C24H50NO7P/c1-5-6-7-8-9-10-11-12-13-14-15-16-17-18-24(27)30-21-23(26)22-32-33(28,29)31-20-19-25(2,3)4/h23,26H,5-22H2,1-4H3/t23-/m1/s1	ASWBNKHCZGQVJV-HSZRJFAPSA-N	460602	METLIN	LPC(1-acyl 16:0)-Ⅱ	Lysophosphatide	C24H50NO7P	496.34	496.339	-1.41032	496.3391 104.1072 86.0969 184.0732 124.9998 60.0815	30	Oryza sativa	Chen, W. et al., Nature Genetics (2014) 714-721	B
582	m1598	1.42									497.126		497.1261 215.0505 497.1605 84.0813 130.086	30
583	m1599	1.9									497.126		497.1262 84.0813 130.0863 86.0969 188.0919	30
584	m1608	17.82									498.378		498.3783 236.1490 58.0660 480.3669 59.0737	30
585	m1609	18.19									498.378		498.3781 236.1490 58.0659 480.3684 67.0550 60.0815	30
586	m1610	1.44									499.084		499.0843 107.0494 185.0291 173.0294 145.0345	30
587	m1613	1.92									500.161		500.1610	30
588	m1614	7.14									500.176		500.1759	30
589	m1617	19.25									500.394		500.3940	30
590	m1618	19.64									500.394		500.3940	30
591	m1619	3.5									501.224		501.2244	30
592	m1621	9.18									501.175		501.1749 203.0699 339.1225 161.0230 147.0804 440.9320	30
593	m1624	22.39									501.376		501.3758	30
594	m1625	1.43									503.116		503.1159 85.0289 69.0342 321.1003 127.0387 315.3979	30
595	m1626	6.27									503.191		503.1910 137.0597 86.0967 311.1283 122.0364 175.0750	30
596	m1631	10.08									503.118		503.1179 255.0647 153.0180	30
597	m1634	7.33									504.316		504.3164 252.2318 486.3065 70.0658 250.2527 312.2533	30
598	m1635	7.48									504.317		504.3165 252.2319 70.0658 486.3047 250.2527 67.0549	30
599	m1636	7.6									504.316		504.3164 486.3062 252.2320 250.2524 81.0704 67.0550	30
600	m1637	7.72									504.316		504.3164 486.3054 252.2314 95.0858 81.0704 67.0550	30
601	m1638	15.72									504.266		504.2657 358.1641 149.0119 167.0223 277.1380 293.0521	30
602	m1642	2.96									508.202		508.2023 120.0809 166.0862 103.0545 131.0495	30
603	m1643	4.96									508.311		508.3113 346.2581 328.2480 81.0704	30
604	m1645	6.46									508.311		508.3113 490.3003 67.0549 81.0704 81.0340 446.2743	30
605	m1646	6.9									508.311		508.3112 346.2581 328.2474 85.0289 69.0341 81.0704	30
606	m1649	8.52									509.885		509.8853 114.0915 96.0812 209.1645 113.1075	30
607	m1654	16.78									511.29		511.2898 81.0703 67.0549 105.0703 219.7798 413.6934	30
608	m1658	5.2									513.158		513.1576	30
609	m1661	13.2									513.305		513.3054 351.2512 93.0702 105.0699 259.2064 79.0547	30
610	m1662	13.45									513.305		513.3054 93.0703 105.0701 119.0856 145.1013 421.2573	30
611	m1663	15.33									513.271		513.2710	30
612	m1667	9.4									515.116		515.1157	30
613	m1668	10.42									515.116		515.1157	30
614	m1670	15.76									515.321		515.3210 81.0705 67.0548 95.0857 131.0858	30
615	m1673	19.47									515.319		515.3186 403.7301 379.3822 148.0380 75.8322 52.6796	30
616	m1674	3.54									517.155		517.1549 163.0388 135.0438 145.0283 117.0336 89.0390	30
617	m1675	4.05									517.155		517.1551	30
618	m1678	5.37									517.155		517.1547	30
619	m1680	17.19									517.292		517.2921 113.0000 331.2625 405.2987 179.1428 123.0805	30
620	m1681	7.69									518.891		518.8906	30
621	m1682	15.58	InChI=1S/C26H48NO7P/c1-5-6-7-8-9-10-11-12-13-14-15-16-17-18-19-20-26(29)32-23-25(28)24-34-35(30,31)33-22-21-27(2,3)4/h6-7,9-10,12-13,25,28H,5,8,11,14-24H2,1-4H3/b7-6-,10-9-,13-12-	WKQNRCYKYCKESD-QNEBEIHSSA-N	24779470	METLIN	LPC(1-acyl 18:3)-I	Lysophosphatide	C26H48NO7P	518.324	518.324	-0.771718	518.3237 184.0731 86.0969 124.9998 98.9845 60.0816	30	Oryza sativa	Matsuda, F. et al., The Plant Journal (2012) 624-636	B
622	m1683	15.92	InChI=1S/C26H48NO7P/c1-5-6-7-8-9-10-11-12-13-14-15-16-17-18-19-20-26(29)32-23-25(28)24-34-35(30,31)33-22-21-27(2,3)4/h6-7,9-10,12-13,25,28H,5,8,11,14-24H2,1-4H3/b7-6-,10-9-,13-12-/t25-/m1/s1	WKQNRCYKYCKESD-YVHLTTHBSA-N	24779469	METLIN	LPC(1-acyl 18:3)-II	Lysophosphatide	C26H48NO7P	518.324	518.324	-0.578788	518.3238 104.1073 86.0969 184.0731 124.9999 60.0816	30	Oryza sativa	Matsuda, F. et al., The Plant Journal (2012) 624-636	B
623	m1684	8.42	InChI=1S/C24H22O13/c25-11-3-1-10(2-4-11)15-7-14(27)20-13(26)5-12(6-16(20)36-15)35-24-23(33)22(32)21(31)17(37-24)9-34-19(30)8-18(28)29/h1-7,17,21-26,31-33H,8-9H2,(H,28,29)/t17-,21-,22+,23-,24-/m1/s1	JXWAQRJFONLTSI-ASDZUOGYSA-N	5281602	METLIN	Apigenin 7-O-malonylglucoside	Flavonoid	C24H22O13	519.113	519.113	-0.577909	519.1130 271.0597 153.0180 171.0287	30	Oryza sativa	Chen, W. et al., Nature Genetics (2014) 714-721	B
624	m1685	16.69	InChI=1S/C26H50NO7P/c1-5-6-7-8-9-10-11-12-13-14-15-16-17-18-19-20-26(29)32-23-25(28)24-34-35(30,31)33-22-21-27(2,3)4/h9-10,12-13,25,28H,5-8,11,14-24H2,1-4H3/b10-9-,13-12-/t25-/m1/s1	SPJFYYJXNPEZDW-FTJOPAKQSA-N	11005824	METLIN	LPC(1-acyl 18:2)-I	Lysophosphatide	C26H50NO7P	520.34	520.34	-0.576546	520.3395 184.0732 86.0969 124.9998 71.0736 60.0815	30	Oryza sativa	Matsuda, F. et al., The Plant Journal (2012) 624-636	B
625	m1686	17.05	InChI=1S/C26H50NO7P/c1-5-6-7-8-9-10-11-12-13-14-15-16-17-18-19-20-26(29)32-23-25(28)24-34-35(30,31)33-22-21-27(2,3)4/h9-10,12-13,25,28H,5-8,11,14-24H2,1-4H3/b10-9-,13-12-	SPJFYYJXNPEZDW-UTJQPWESSA-N	11988421	METLIN	LPC(1-acyl 18:2)-II	Lysophosphatide	C26H50NO7P	520.34	520.339	-0.960911	520.3393 104.1072 86.0969 184.0732 124.9997 60.0815	30	Oryza sativa	Matsuda, F. et al., The Plant Journal (2012) 624-636	B
626	m1690	5.83									521.201		521.2013 103.0545 131.0491 163.0750 95.0494	30
627	m1693	18.06	InChI=1S/C26H52NO7P/c1-5-6-7-8-9-10-11-12-13-14-15-16-17-18-19-20-26(29)32-23-25(28)24-34-35(30,31)33-22-21-27(2,3)4/h12-13,25,28H,5-11,14-24H2,1-4H3/b13-12-/t25-/m1/s1	YAMUFBLWGFFICM-PTGWMXDISA-N	16081932	METLIN	LPC(1-acyl 18:1)-I	Lysophosphatide	C26H52NO7P	522.355	522.355	-0.765762	522.3550 184.0729 86.09680 124.9997 104.1077	30	Zea mays	Wen, W. et al., Nature Communications (2014) 3438-3447	B
628	m1694	18.42	InChI=1S/C26H52NO7P/c1-5-6-7-8-9-10-11-12-13-14-15-16-17-18-19-20-26(29)32-23-25(28)24-34-35(30,31)33-22-21-27(2,3)4/h10-11,25,28H,5-9,12-24H2,1-4H3/b11-10-/t25-/m1/s1	PZRFVAHZNWPPAC-VBKSFVIKSA-N	53480465	METLIN	LPC(1-acyl 18:1)-II	Lysophosphatide	C26H52NO7P	522.355	522.355	-0.574322	522.3551 86.09680 104.1072 184.0730 124.9998	30	Zea mays	Wen, W. et al., Nature Communications (2014) 3438-3447	B
629	m1696	16.25									523.287		523.2873	30
630	m1697	1.89									524.149		524.1495	30
631	m1700	20.15	InChI=1S/C26H54NO7P/c1-5-6-7-8-9-10-11-12-13-14-15-16-17-18-19-20-26(29)32-23-25(28)24-34-35(30,31)33-22-21-27(2,3)4/h25,28H,5-24H2,1-4H3/t25-/m1/s1	IHNKQIMGVNPMTC-RUZDIDTESA-N	497299	METLIN	LPC(1-acyl 18:0)	Lysophosphatide	C26H54NO7P	524.371	524.371	-0.953523	524.3706 86.09680 104.1072 184.0730 124.9997 60.0815	30	Zea mays	Wen, W. et al., Nature Communications (2014) 3438-3447	B
632	m1703	7.88									527.246		527.2465	30
633	m1704	8.86									527.246		527.2460 289.0544 395.3239 454.4068 149.0937 116.4361	30
634	m1705	9.41									527.246		527.2463 483.2532 509.2351 224.2599 289.0538 62.0096	30
635	m1706	5.93									528.243		528.2433	30
636	m1708	6.85									528.28		528.2798 230.1538 162.0910 118.0654 292.1906 366.2291	30
637	m1710	7.36									529.214		529.2137 191.0813 307.1283 350.1339 147.0914 85.0288	30
638	m1712	10.81									529.131		529.1310	30
639	m1714	6.86									530.213		530.2130 371.1231 237.1019 265.0955 146.0599 339.0980	30
640	m1715	1.45									531.111		531.1107 72.0814 119.0190 185.0294 224.0011 289.0104	30
641	m1718	1.56									533.154		533.1545 281.0701 362.0964 85.0289 200.0438 191.0386	30
642	m1720	7.26									533.201		533.2012 167.0702 341.1376 187.0747	30
643	m1721	7.38									534.327		534.3267 474.3061 70.0658 252.2316 95.0860	30
644	m1722	7.54									534.327		534.3269 474.3056 70.0658 252.2319 81.0704 250.2527	30
645	m1723	8.01									534.327		534.3269 474.3057 252.2315 287.0544 81.0705 67.0550	30
646	m1728	7.88	InChI=1S/C24H22O14/c25-10-3-1-9(2-4-10)22-23(19(32)17-12(27)5-11(26)6-13(17)36-22)38-24-21(34)20(33)18(31)14(37-24)8-35-16(30)7-15(28)29/h1-6,14,18,20-21,24-27,31,33-34H,7-8H2,(H,28,29)/t14-,18-,20?,21?,24+/m1/s1	XEXCLTHHXIWUHO-NHODZQDWSA-N	44258856	METLIN	Kaempferol 3-O-malonylglucoside	Flavonoid	C24H22O14	535.108	535.108	-0.747512	535.1078 287.0545 85.0289 81.0341 153.0181 69.0342	30	Mulberry	Ju, W. T. et al., Journal of food science and technology (2018) 1789-1796	B
647	m1728-1	7.7	InChI=1S/C24H22O14/c25-11-2-1-9(3-12(11)26)15-6-14(28)20-13(27)4-10(5-16(20)37-15)36-24-23(34)22(33)21(32)17(38-24)8-35-19(31)7-18(29)30/h1-6,17,21-27,32-34H,7-8H2,(H,29,30)/t17-,21-,22+,23-,24-/m1/s1	RNDGJCZQVKFBPI-ASDZUOGYSA-N	5281669	METLIN	Luteolin 7-O-malonylglucoside	Flavonoid	C24H22O14	535.108	535.107	-1.49502	535.1074 287.0540 153.0178 135.0437 137.0229		Oryza sativa	Chen, W. et al., Nature Genetics (2014) 714-721	B
648	m1731	1.41									538.116		538.1163 195.9776 132.0177 254.9755 310.8798 390.5939	30
649	m1732	6.03									538.285		538.2855 209.1538 109.1014 69.0341 97.0285 133.1006	30
650	m1733	6.88									538.14		538.1397 84.0449 81.0340 126.0549 290.0864 69.0342	30
651	m1736	18.07									539.318		539.3185	30
652	m1737	18.42									539.318		539.3185 148.3580 413.4407 445.7524 148.3580 87.9103	30
653	m1738	20.61									539.334		539.3338	30
654	m1739	21.91									539.264		539.2645	30
655	m1743	5.75									541.225		541.2247	30
656	m1744	6.08									541.225		541.2249	30
657	m1747	2.87									542.223		542.2229 120.0809 166.0860 103.0545 390.3867	30
658	m1752	1.4									543.131		543.1315 381.0786 363.0682	30
659	m1758	8.53									546.327		546.3267 280.2630 298.2736 502.3366 262.2523 340.2861	30
660	m1759	7.89									547.348		547.3482 114.1279 85.0891	30
661	m1761	9.16									548.342		548.3422 300.2895 282.2774 264.2668 504.3506 81.0703	30
662	m1762	9.38									548.342		548.3423 282.2786 300.2886 264.2672 149.0593 504.3482	30
663	m1767	7.24	InChI=1S/C24H22O15/c25-9-4-12(28)17-13(5-9)37-22(8-1-2-10(26)11(27)3-8)23(19(17)33)39-24-21(35)20(34)18(32)14(38-24)7-36-16(31)6-15(29)30/h1-5,14,18,20-21,24-28,32,34-35H,6-7H2,(H,29,30)/t14-,18-,20+,21-,24+/m1/s1	NBQPHANHNTWDML-UJKBSQBPSA-N	5282159	METLIN	Quercetin 3-O-malonylglucoside	Flavonoid	C24H22O15	551.103	551.103	-0.544363	551.1028 303.0495 229.0494 153.0181 81.0341 85.0289	30	Mulberry	Ju, W. T. et al., Journal of food science and technology (2018) 1789-1796	B
664	m1768	14.03									551.282		551.2822	30
665	m1769	16.77									551.282		551.2823	30
666	m1770	6.18									552.301		552.3013 175.1481 119.0857 133.1012 204.0864 372.2020	30
667	m1771	6.55									552.314		552.3138 86.0969 110.0714 156.0765 69.0705 256.1650	30
668	m1774	13.2									553.298		553.2979 91.9573 127.9468 148.9677 180.8678	30
669	m1781	6.04									557.256		557.2565 377.1921 203.0525 338.2627 535.3658	30		s
670	m1785	1.91									558.203		558.2029 234.0968 85.0290 172.0604 69.0341 216.0863	30
671	m1792	15.18									561.211		561.2114	30
672	m1795	4.04									562.176		562.1763 400.1234 238.0705 210.0755 171.6569	30
673	m1796	5.19									562.254		562.2542	30
674	m1798	6.47									563.21		563.2096	30
675	m1799	1.35									564.109		564.1087 221.9926 94.9299 118.6504	30
676	m1800	7.83									564.337		564.3375 316.2841 298.2734 280.2626 520.3488 81.0704	30
677	m1801	7.55					Apigenin O-pentosyl-O-hexoside	Flavonoid	C26H28O14	565.155	565.156	1.94637	565.1563 271.0594 433.1097 153.0178 119.0492	30	Oryza sativa	Chen, W. et al., Nature Genetics (2014) 714-721	B
678	m1802	9.73									565.191		565.1913 163.0752 181.0858 105.0701 299.1277	30
679	m1804	11.48									565.189		565.1887 521.1977 479.1910 317.1367 163.0378	30
680	m1809	7.38	InChI=1S/C30H55N5O5/c1-11-19(9)24-29(39)32-21(13-16(3)4)26(36)31-22(14-17(5)6)27(37)34-25(20(10)12-2)30(40)33-23(15-18(7)8)28(38)35-24/h16-25H,11-15H2,1-10H3,(H,31,36)(H,32,39)(H,33,40)(H,34,37)(H,35,38)/t19-,20-,21-,22-,23-,24-,25-/m0/s1	KACXIDDXMHJUSH-HUVRVWIJSA-N	91699031		Viscumamide	Others	C30H55N5O5	566.428	566.427	-0.882725	566.4271 114.0915 548.4164 209.1645 322.2478 96.0812	30	Zea mays	Wen, W. et al., Nature Communications (2014) 3438-3447	C
681	m1811	5.59									567.17		567.1705 243.0635 85.0290 267.0642 215.0698 285.0750	30
682	m1818	21.38									567.26		567.2595	30
683	m1819	5.2									568.296		568.2961 550.2851 388.2323 98.0603 86.0605 149.0956	30
684	m1821	1.18									569.022		569.0220 303.0076 445.0211 279.0084 91.9563	30
685	m1822	4.81									569.186		569.1857 245.0795 107.0495 135.0441 123.0440 85.0287	30
686	m1823	7.78									569.319		569.3195 84.0815 104.0533 120.0809 260.1056 149.0741	30
687	m1824	13.47									569.272		569.2719	30
688	m1831	8.92									573.196		573.1963 189.0907 147.0801 85.0288 215.1065 325.1436	30
689	m1834	7.86									575.432		575.4323	30
690	m1835	10.9									575.212		575.2117 135.0440 191.1065 161.0588 85.0288 217.1218	30
691	m1837	3.72									576.192		576.1917 414.1388 222.0757 270.0966 109.0286 378.1174	30
692	m1839	4.38									576.192		576.1921 432.1500 222.0760 109.0287 85.0290 414.1390	30
693	m1842	16.04									577.277		577.2766 98.9845 155.0098 67.0550 93.0702 335.2569	30
694	m1845	7.61									578.317		578.3167 330.2631 312.2537 268.2627 69.0341	30
695	m1846	7.87									578.316		578.3164 330.2635 250.2534 266.2471 312.2526 95.0859	30
696	m1847	6.61									579.207		579.2066 167.0701 181.0494 145.0649 387.1424 417.1545	30
697	m1848	7.24									579.207		579.2065 167.0701 181.0491 387.1447 417.1542 145.0645	30
698	m1850	9.2									580.332		580.3324 60.0452 332.2794 562.2847 544.0434 136.6078	30
699	m1851	10.05									580.332		580.3324 314.2684 332.2792 296.2579 74.0244	30
700	m1852	8.29									581.333		581.3331 114.1278 85.0891 69.0705	30
701	m1852-1	6.91				METLIN	Luteolin O-pentosyl-O-hexoside	Flavonoid	C26H28O15	581.15	581.148	-3.09731	581.1483 287.0539 135.0442 153.0186	30	Oryza sativa	Chen, W. et al., Nature Genetics (2014) 714-721	B
702	m1853	8.86									581.333		581.3329 148.1118 133.0884 105.0698	30
703	m1854	18.87									581.456		581.4558 93.0702 131.0854 79.0545 67.0548	30
704	m1855	19.02									581.456		581.4559 93.0702 79.0545 131.0854 105.0702 67.0548	30
705	m1856	8.72									582.348		582.3478 298.2729 95.0857 316.2729 85.0287 60.0450	30
706	m1860	20.35									583.414		583.4141 119.0854 105.0698 145.1008 93.0703 323.3538	30
707	m1861	20.77									583.414		583.4141 91.0546 145.1010 209.1317 105.0701 245.0321	30
708	m1862	2.98									584.233		584.2332 120.0808 166.0860 103.0546	30
709	m1863	6.58									584.438		584.4376	30
710	m1864	10.04									585.288		585.2879 187.0749 229.0675 309.8606 122.2980 91.0545	30
711	m1878	10.09									587.212		587.2117 189.0907 81.0341 127.0389 147.0806 85.0289	30
712	m1884	7.37									588.409		588.4089 438.0495 350.4986 96.9617 215.4920	30
713	m1885	1.42									589.705		589.7051 130.0862 84.0813 245.0503 365.0920 425.1135	30
714	m1890	1.91									590.265		590.2651 130.0862 84.0813 134.0812 288.5877	30
715	m1892	21.97									591.26		591.2596 531.2382 429.2070 415.1913 559.2351 459.2166	30
716	m1893	7.85									592.369		592.3686 298.2734 280.2634 262.2525 69.0342 85.0290	30
717	m1894	8.24									592.332		592.3325 214.1438 98.0604 87.0447 196.1331	30
718	m1895	8.37									592.332		592.3323 214.1434 98.0603 376.1955 430.2782 196.1331	30
719	m1899	8.52									594.384		594.3843 300.2889 282.2790 264.2679 462.3406 85.0287	30
720	m1900	6.1				METLIN	Apigenin di-O-hexoside	Flavonoid	C27H30O15	595.166	595.165	-1.84822	595.1646 271.0596 433.1126 153.0178 119.0492	30	Oryza sativa	Chen, W. et al., Nature Genetics (2014) 714-721	B
721	m1902	7.05				METLIN	Kaempferol O-rhamnosyl-O-hexoside	Flavonoid	C27H30O15	595.166	595.165	-0.840102	595.1652 287.0546 85.0289 71.0499 153.0181 121.0284	30	Mulberry	Ju, W. T. et al., Journal of food science and technology (2018) 1789-1796	B
722	m1903	7.33	InChI=1S/C27H30O15/c1-9-17(31)20(34)22(36)26(39-9)38-8-15-18(32)21(35)23(37)27(41-15)42-25-19(33)16-13(30)6-12(29)7-14(16)40-24(25)10-2-4-11(28)5-3-10/h2-7,9,15,17-18,20-23,26-32,34-37H,8H2,1H3/t9-,15+,17-,18+,20+,21-,22+,23+,26+,27-/m0/s1	RTATXGUCZHCSNG-QHWHWDPRSA-N	5318767	METLIN	Kaempferol 3-O-rutinoside	Flavonoid	C27H30O15	595.166	595.165	-1.17614	595.1650 287.0546 85.0289 71.0498 153.0179 121.0284	30	Mulberry	Ju, W. T. et al., Journal of food science and technology (2018) 1789-1796	A
723	m1904	8.63									595.349		595.3486 120.0809 60.0816 567.3523 103.0545 177.0911	30
724	m1905	9					Apigenin derivative	Flavonoid			595.143		595.1426 271.0592 153.0175 163.0384 145.0289 119.0500	30			B
725	m1908	6.3									597.181		597.1807 137.0232 273.0750 435.1270 81.0340	30
726	m1917	22.66									599.249		599.2489	30
727	m1918	2.99									600.228		600.2281 120.0808 166.0860 103.0543 131.0493	30
728	m1922	20.06									600.416		600.4158 91.0546 143.0854 105.0699 211.1479 119.0852	30
729	m1926	22.55									600.415		600.4154 105.0699 119.0855 93.0701 79.0548 368.4424	30
730	m1931	7.83									603.204		603.2038	30
731	m1937	15.45									603.367		603.3674 135.0441 191.1063 79.0548 161.0594 93.0701	30
732	m1938	5.12									604.181		604.1805	30
733	m1941	1.43									605.22		605.2204 84.0812 107.8116 486.4425 548.1874 77.6975	30
734	m1943	5.96									607.252		607.2516	30
735	m1946	19.92									607.254		607.2543 547.2328 431.1852 579.2582 403.1891 417.1698	30
736	m1947	20.31									607.254		607.2544 579.2591 547.2327 403.1928 519.2399	30
737	m1949	7.32									608.384		608.3843 314.2681 296.2575 278.2477 476.3205 69.0341	30
738	m1954	21.32									609.27		609.2698 461.1959 591.2582 531.2403 559.2325 475.2111	30
739	m1956	22.88									609.412		609.4116 357.0138 423.7085 635.7413 530.0782	30
740	m1958	1.35									611.098		611.0982 268.9817 176.9348 268.9817 94.9299 176.9348	30
741	m1960	5.49				METLIN	Kaempferol di-O-hexoside-I	Flavonoid	C27H30O16	611.161	611.16	-0.981739	611.1601 287.0545 153.0180 135.0439 449.1068 303.0496	30	Mulberry	Ju, W. T. et al., Journal of food science and technology (2018) 1789-1796	B
742	m1961	8.39				METLIN	Luteolin derivative	Flavonoid			611.139		611.1394 287.0542 135.0446 153.0190 241.0522 117.0339	30			B
743	m1962	6.64				METLIN	Kaempferol di-O-hexoside-II	Flavonoid	C27H30O16	611.161	611.16	-1.47261	611.1598 287.0543 303.0492 85.0289 91.9588 153.0180	30	Mulberry	Ju, W. T. et al., Journal of food science and technology (2018) 1789-1796	B
744	m1963	6.81	InChI=1S/C27H30O16/c1-8-17(32)20(35)22(37)26(40-8)39-7-15-18(33)21(36)23(38)27(42-15)43-25-19(34)16-13(31)5-10(28)6-14(16)41-24(25)9-2-3-11(29)12(30)4-9/h2-6,8,15,17-18,20-23,26-33,35-38H,7H2,1H3/t8-,15+,17-,18+,20+,21-,22+,23+,26+,27-/m0/s1	IKGXIBQEEMLURG-NVPNHPEKSA-N	5280805	METLIN	Rutin	Flavonoid	C27H30O16	611.161	611.159	-2.78159	611.1590 303.0494 85.0289 71.0498 229.0491 153.0180	30	Mulberry	Ju, W. T. et al., Journal of food science and technology (2018) 1789-1796	A
745	m1964	7.33									613.34		613.3397	30
746	m1966	18.03									613.265		613.2649	30
747	m1967	20.85									613.265		613.2649	30
748	m1969	8.49									614.353		614.3527 123.0440 330.2627 69.0341 95.0495 414.6895	30
749	m1971	4.24									615.275		615.2755 146.0598 188.0703 118.0652 205.0967 170.0595	30
750	m1972	5.05									615.189		615.1891	30
751	m1974	9.15									615.317		615.3168 148.1118 133.0885 105.0700 181.2331	30
752	m1975	22.19									615.257		615.2572	30
753	m1976	22.5									615.257		615.2570	30
754	m1979	16.55									617.383		617.3831 149.0595 205.1222 119.0491 91.0547 285.1119	30
755	m1984	10.71									618.348		618.3476 200.0914 491.2365 362.1428 186.0759 91.9629	30
756	m1987	13.47									619.232		619.2319	30
757	m1988	14.05									619.232		619.2317 507.1070 495.1047 563.1638 352.6822 457.6870	30
758	m1994	21.76									621.27		621.2697 561.2464 431.1817 533.2604 419.2257 445.2066 593.2776	30
759	m1995	22.07									621.27		621.2700 561.2489 431.1866 593.2749 417.1693 445.2012	30
760	m1998	16.96									623.361		623.3611 349.1669 331.1581 564.6981 173.0487 265.1105	30
761	m1999	18.88									623.249		623.2493 545.5164 91.9620 314.6472	30
762	m2000	19.5									623.249		623.2492 545.2165 605.2365 573.2127 576.5204 395.4215	30
763	m2006	21.65									623.287		623.2866 445.2019 605.2762 431.1847 458.2104 417.1696	30
764	m2008	7.04									624.358		624.3578 330.2633 250.2529 492.3171 250.2529 312.2512	30
765	m2012	18.13									625.265		625.2647	30
766	m2013	17.22									625.265		625.2648	30
767	m2017	21.48									625.265		625.2652 451.2111 538.2591 493.2537 405.2083 386.9796	30
768	m2025	6.19				METLIN	Quercetin di-O-hexoside	Flavonoid	C27H30O17	627.156	627.154	-2.71065	627.1539 303.0493 85.0289 153.0179 229.0490	30	Mulberry	Ju, W. T. et al., Journal of food science and technology (2018) 1789-1796	B
769	m2026	14.93									627.28		627.2805 567.2583 449.1972 479.2061 149.3895 180.5537	30
770	m2030	19.91									629.236		629.2355	30
771	m2033	4.98									631.184		631.1837 123.0442 347.0957 533.7612 91.9571 364.4483	30
772	m2038	21.8									631.251		631.2512	30
773	m2039	5.45									633.141		633.1414	30
774	m2044	1.91									634.255		634.2545 84.0813 130.0862 218.2244	30
775	m2047	8.87									634.359		634.3591 159.0916 130.0654 606.3639 60.0815 291.1940	30
776	m2050	22.9									635.285		635.2853	30
777	m2052	20.2									636.281		636.2808	30
778	m2053	20.65									636.281		636.2806	30
779	m2059	21.14									637.265		637.2650 559.2333 619.2531 587.2299 415.1901 531.2323	30
780	m2063	18.48									639.28		639.2802 579.2559 359.0007 270.0664 213.8297 155.2641	30
781	m2064	19.17									639.244		639.2441	30
782	m2065	19.73									639.28		639.2803	30
783	m2066	22.12									639.28		639.2803	30
784	m2067	22.45									639.28		639.2802	30
785	m2068	6.71									640.389		640.3890 316.2839 163.0385 85.0287 478.3337 280.2620	30
786	m2071	6.5									641.207		641.2066 163.0387 181.0493 317.1010 299.0930 479.1535	30
787	m2072	6.69									641.206		641.2063 163.0387 181.0492 479.1530 299.0910 317.1022	30
788	m2074	9.09									641.149		641.1491 393.0959 299.0543 229.0493 121.0285 173.0595	30
789	m2075	11.29									641.352		641.3522	30
790	m2076	11.49									641.352		641.3524 105.0700 79.0546 351.2311 461.2883 129.0697	30
791	m2079	16.77									641.296		641.2962 581.2769 522.4644 449.1934 85.1006 320.8755	30
792	m2085	20.61									643.418		643.4176 380.3238 542.7386 573.6140 72.0736 124.6714	30
793	m2086	21.4									643.275		643.2755 611.2463 523.2308 373.3029 261.1385 91.9564	30
794	m2092	12.04									645.19		645.1896 513.1382 497.1164 301.6589 246.7255 90.0930	30
795	m2096	1.44									647.157		647.1573 394.7491 245.0502 304.1233 354.8554 188.5134	30
796	m2097	1.35									649.017		649.0170 202.8905 306.9016 94.9300 136.9400 409.5310	30
797	m2099	8.41									649.268		649.2678 487.2093 283.0682 184.0673 95.2221	30
798	m2102	17.24									649.242		649.2422 167.0335 205.0856 149.0231 267.0644 215.0695	30
799	m2104	6.02									650.171		650.1711 299.0544 547.1094 121.0285 183.0290 243.0649	30
800	m2105	21.9									651.281		651.2808	30
801	m2106	7.53									652.411		652.4108	30
802	m2107	6.4									653.283		653.2825 136.0756 265.1175 108.0809 164.0705 454.1977	30
803	m2108	7.64									653.256		653.2561 70.0658 118.0652 146.0598 185.0920 358.1414	30
804	m2109	20.14									653.26		653.2599	30
805	m2111	20.91									653.26		653.2598 100.1124 86.0968 313.2486 625.4485 228.1582	30
806	m2112	5.91									654.369		654.3690 474.3047 492.3149 70.0658 81.0702 252.2316	30
807	m2113	6.08									654.369		654.3691 474.3054 492.3172 252.2314 70.0659 276.2318	30
808	m2116	7.26									654.369		654.3687 330.2631 85.0289 474.3028 252.2315 492.3153	30
809	m2120	19.18									655.312		655.3116 595.2927 407.2239 462.1971 435.2165 256.7895	30
810	m2125	22.78									657.291		657.2911 91.9584 613.3010 333.1292 407.1825	30
811	m2126	9									659.27		659.2704 172.0391 204.0652 474.1651 627.2415 515.6954	30
812	m2130	14.31									659.382		659.3823 349.1680 229.0744 56.9656 213.0794 231.0901	30
813	m2131	14.59									659.382		659.3823 349.1684 231.0902 229.0743 56.9655 247.0850	30
814	m2139	1.45									661.138		661.1375 107.0494 337.0976 221.0495 535.6548	30
815	m2146	8.92									663.265		663.2652 189.0907 147.0801 171.0800 81.0702 105.0702	30
816	m2147	15.55									663.413		663.4134	30
817	m2148	16.21									663.413		663.4132	30
818	m2149	1.92									664.116		664.1161 136.0617 428.0378 524.0568 97.0289 348.0705	30
819	m2150	4.23									665.218		665.2183 146.0598 188.0704 118.0652 205.0970 170.0598	30
820	m2154	7.49									665.207		665.2069 167.0700 181.0491 145.0648 417.1549 117.0698	30
821	m2155	8.1									665.207		665.2070 167.0700 181.0493 145.0647 417.1534 553.3591	30
822	m2158	8.72									665.233		665.2327 615.2401 503.1785 149.0118 259.1222 344.9020	30
823	m2159	9.5									665.243		665.2430 167.0336 205.0855 267.0647 135.0440 341.1387	30
824	m2160	9.77									665.243		665.2433 167.0336 205.0855 267.0645 149.0231 341.1396	30
825	m2164	21.74									667.275		667.2753 580.2641 607.2552 405.2050 307.5787 255.7311	30
826	m2165	22.27									667.275		667.2755	30
827	m2167	8.96									668.343		668.3431 60.0816 130.650 185.0707 159.0909 289.7151	30
828	m2175	19.75									671.27		671.2702	30
829	m2176	21.04									671.27		671.2704	30
830	m2180	6.02									673.308		673.3083	30
831	m2181	6.21									673.308		673.3080	30
832	m2183	12.74									673.362		673.3616	30
833	m2190	13.14									675.266		675.2657 497.1817 91.9628 251.6612 121.3542 482.1588	30
834	m2192	16.9									675.229		675.2287	30
835	m2193	17.1									675.229		675.2290	30
836	m2194	20.75									675.429		675.4293 603.3723 478.5836 360.3271 222.1098 172.4978	30
837	m2196	14.05									677.393		677.3926 349.1305 148.9846 367.1409 116.9847 153.9914	30
838	m2202	7.8									679.511		679.5107 114.0914 96.0811 209.1645 113.1074 69.0706	30
839	m2205	6.71				METLIN	Apigenin O-hexosyl-O-malonylhexoside	Flavonoid	C30H32O18	681.166	681.168	2.49572	681.1678 271.0596 433.1109 119.0492 153.0178	30	Oryza sativa	Chen, W. et al., Nature Genetics (2014) 714-721	B
840	m2206	7.03									681.275		681.2753 259.1072 319.1282 301.1178 214.0861 172.0390	30
841	m2207	7.28				METLIN	Kaempferol O-rhamnosyl-O-malonylhexoside	Flavonoid	C30H32O18	681.166	681.165	-1.32126	681.1652 287.0545 85.0289 535.1066 259.1072	30	Mulberry	Ju, W. T. et al., Journal of food science and technology (2018) 1789-1796	B
842	m2212	8.1									684.249		684.2488 190.0629 145.0643 205.0859 167.0698 265.1081	30
843	m2213	19.67									685.286		685.2859	30
844	m2221	15.76									688.358		688.3584	30
845	m2225	18.42									689.244		689.2443	30
846	m2230	12.74									691.26		691.2605	30
847	m2234	6.99									693.276		693.2756 136.0755 108.0809 339.0971 265.0966 293.0918	30
848	m2237	17.29									693.345		693.3448	30
849	m2238	17.76									693.345		693.3445	30
850	m2243	10.84									695.403		695.4033 367.1784 269.1050 231.0900 385.1885 56.9655	30
851	m2249	6.38									696.537		696.5373	30
852	m2250	7.74									696.379		696.3790 70.0656 312.2529 250.2522 372.2733 545.4807	30
853	m2251	5.75				METLIN	Kaempferol O-hexosyl-O-malonylhexoside-I	Flavonoid	C30H32O19	697.161	697.16	-1.14751	697.1603 287.0544 449.1074 81.0340 85.0289 153.0180	30			B
854	m2252	6.47				METLIN	Kaempferol O-hexosyl-O-malonylhexoside-II	Flavonoid	C30H32O19	697.161	697.16	-1.14751	697.1603 287.0545 449.1085 153.0175 81.0341	30			B
855	m2253	6.78				METLIN	Quercetin O-rhamnosyl-O-malonylhexoside	Flavonoid	C30H32O19	697.161	697.16	-1.29095	697.1602 303.0487 551.0999 229.0485 85.0287 257.0436 389.2238	30			B
856	m2254	6.96									697.519		697.5195	30
857	m2261	16.45									701.371		701.3709 539.3185 432.7721 406.5063 171.7993 129.1873 104.1535	30
858	m2262	16.87									701.371		701.3708 539.3199 456.6568 436.5021 269.1133 219.4753	30
859	m2264	1.91									705.184		705.1844 543.1299 525.1153 598.6596 298.5327 160.4792	30
860	m2265	5.19									705.293		705.2935	30
861	m2267	19.98									705.402		705.4023 543.3520 501.2113 476.8991 619.8409 452.0197 199.8319	30
862	m2269	21.09									706.322		706.3224	30
863	m2270	1.39									707.209		707.2086 245.0501 185.0292 365.0921 425.1131 161.0292 119.0189	30
864	m2271	9.27									707.292		707.2915 550.2167 399.1066 293.0919 249.1024 71.0501 675.2610	30
865	m2283	5.23				METLIN	Quercetin O-hexosyl-O-malonylhexoside	Flavonoid	C30H32O20	713.156	713.155	-0.701109	713.1555 303.0493 465.1019 229.0491 153.0183 81.0340	30			B
866	m2284	6.36				METLIN	Quercetin O-hexosyl-O-malonylhexoside	Flavonoid	C30H32O20	713.156	713.155	-0.701109	713.1555 303.0493 465.1047 81.0342 229.0493 257.0426	30			B
867	m2285	14.2									713.258		713.2584 145.0281 177.0544 117.0334 89.0388 367.1436 315.9393	30
868	m2286	12.22									715.35		715.3503 199.3247 124.3387 91.9630 553.2922 70.6364	30
869	m2287	12.49									715.35		715.3503 553.2944 462.4248 331.5980 253.1445 102.5564 62.3823	30
870	m2291	7.1									716.123		716.1233	30
871	m2293	5.12									717.308		717.3085	30
872	m2294	7.81									717.466		717.4661 418.8499 561.7480 686.7248 70.0656 303.0490 172.9629	30
873	m2297	10.25									721.353		721.3533 162.0548 116.0601 190.0504 267.0984 482.2558 590.0264	30
874	m2305	12.52									723.435		723.4346	30
875	m2306	12.79									723.3		723.3003 299.0544 561.2462 121.0283 543.2369 363.0853 97.0287	30
876	m2317	22.19									731.327		731.3270	30
877	m2318	22.54									731.327		731.3273	30
878	m2321	1.46									735.114		735.1138 392.9971 227.7206 554.1129 437.0508 85.0290	30
879	m2323	9.12									736.053		736.0532	30
880	m2328	22.86									738.548		738.5481	30
881	m2333	6.05									741.344		741.3441	30
882	m2334	6.6				METLIN	Kaempferol O-rhamnosyl-O-rhamnosyl-O-hexoside	Flavonoid	C33H40O19	741.224	741.223	-1.21421	741.2228 287.0543 449.1060 153.0180 85.0289 258.0524	30	Mulberry	Ju, W. T. et al., Journal of food science and technology (2018) 1789-1796	B
883	m2336	12.13									741.311		741.3111 299.0546 121.0286 561.2496 543.2357 363.0872	30
884	m2341	15.02									745.392		745.3917 437.1925 629.1956 385.0959 163.6301 81.6617	30
885	m2348	6.17									747.344		747.3443	30
886	m2349	20.08									747.428		747.4282 469.2015 519.2903 191.0151 370.0005 672.8077	30
887	m2351	6.03									748.352		748.3519	30
888	m2353	5.73									750.072		750.0719	30
889	m2356	6.88									751.176		751.1755	30
890	m2367	5.47				METLIN	Kaempferol O-rhamnosyl-O-hexosyl-O-hexoside	Flavonoid	C33H40O20	757.219	757.218	-0.792374	757.2180 287.0544 449.1077 85.0289 611.1562 153.0179	30	Mulberry	Ju, W. T. et al., Journal of food science and technology (2018) 1789-1796	B
891	m2368	6.22				METLIN	Quercetin O-rhamnosyl-O-rhamnosyl-O-hexoside-I	Flavonoid	C33H40O20	757.219	757.218	-0.660311	757.2181 303.0494 85.0289 229.0490 153.0180 465.1004	30	Mulberry	Ju, W. T. et al., Journal of food science and technology (2018) 1789-1796	B
892	m2369	6.82				METLIN	Quercetin O-rhamnosyl-O-rhamnosyl-O-hexoside-II	Flavonoid	C33H40O20	757.219	757.218	-0.792374	757.2180 303.0493 85.0289 229.0499 465.1002 153.0179	30	Mulberry	Ju, W. T. et al., Journal of food science and technology (2018) 1789-1796	B
893	m2370	11.91									757.306		757.3060 315.0491 577.2436 137.0232 183.0289 559.2282	30
894	m2373	16.3									760.282		760.2817	30
895	m2374	1.36									761.151		761.1510 136.9399 166.9505 94.9301 256.9812 196.9612	30
896	m2375	9.53									761.228		761.2279 477.1541 495.1656 153.0183 81.0339 311.0550 339.0507	30
897	m2379	4.9									762.108		762.1076 163.0386 135.0438 252.9785 234.9690 377.9816 117.0335	30
898	m2392	5.05				METLIN	Quercetin O-rhamnosyl-O-hexosyl-O-hexoside-I	Flavonoid	C33H40O21	773.213	773.213	-0.905313	773.2128 303.0494 465.1022 85.0289 229.0494 153.0181	30	Mulberry	Ju, W. T. et al., Journal of food science and technology (2018) 1789-1796	B
899	m2393	5.9				METLIN	Quercetin O-rhamnosyl-O-hexosyl-O-hexoside-II	Flavonoid	C33H40O21	773.213	773.213	-0.905313	773.2128 303.0494 85.0289 229.0494 153.0182 465.1013	30	Mulberry	Ju, W. T. et al., Journal of food science and technology (2018) 1789-1796	B
900	m2405	7.77									780.457		780.4573	30
901	m2410	6.32				METLIN	Kaempferol O-malonylhexoside-O-malonylhexoside	Flavonoid	C33H34O22	783.161	783.161	-0.638438	783.1609 287.0541 535.1071 85.0289 439.3463 484.9915 632.6376	30			B
902	m2413	17.06									784.532		784.5320 86.0968 120.0807 154.1585 442.3073 505.8069 765.5251	30
903	m2414	7.38									785.264		785.2643	30
904	m2420	4.4				METLIN	Quercetin O-hexosyl-O-hexosyl-O-hexoside	Flavonoid	C33H40O22	789.208	789.208	-1.01367	789.2076 303.0493 465.1017 627.1525 229.0491 85.0288 137.0230	30			B
905	m2424	17.18									791.451		791.4509 534.2943 277.1373 149.0118 167.0217 317.1786 177.0062	30
906	m2433	6.09									798.341		798.3405	30
907	m2438	8.06									800.406		800.4059 330.2641 147.0437 250.2527 431.0671 268.2628 191.7174	30
908	m2439	8.21									800.405		800.4055 147.0438 330.2628 250.2531 312.2524 404.6468 210.8190	30
909	m2452	7.66									805.291		805.2906 167.0699 385.1289 181.0496 417.1528 643.2391 145.0644	30
910	m2453	8.02									805.291		805.2909 167.0699 181.0493 385.1288 668.5044 145.0643 732.3131	30
911	m2455	4.28									807.317		807.3173 146.0598 188.0704 118.0651 205.0969 170.0595 159.0917	30
912	m2459	12.37									809.301		809.3005 561.2457 299.0545 121.0283 543.2378 363.0860 632.7848	30
913	m2460	12.91									809.301		809.3006 299.0536 327.0854 561.2495 121.0281 500.5397 141.0180	30
914	m2461	7.24									810.605		810.6054 114.0914 96.0809 209.1645 697.5186 228.1594 407.9257	30
915	m2464	8.08									812.07		812.0699	30
916	m2468	8.1									814.577		814.5767 506.5197 307.8528	30
917	m2469	1.45									817.201		817.2007 175.7380 235.6562 334.2207 619.2586 699.6902 70.0659	30
918	m2472	1.36									821.172		821.1715 136.9397 419.0342 381.0781 94.9300 248.8958 478.9233	30
919	m2473	6.03									821.382		821.3818	30
920	m2474	6.17									821.381		821.3815 573.2231 175.1479 411.1692 119.0855 133.1010 219.0169	30
921	m2480	5.95									824.286		824.2860	30
922	m2482	12.59									825.296		825.2956 577.2432 315.0492 343.0796 91.0547 301.0338 276.2099	30
923	m2493	8.08									830.55		830.5500 543.0377 571.0844 91.9620 299.1963	30
924	m2494	8.45									830.415		830.4154 145.0281 177.0543 330.2626 117.0334 490.0073 70.0658	30
925	m2496	22.9									833.557		833.5572	30
926	m2497	4.85									835.212		835.2115	30
927	m2508	8.77									842.416		842.4158 147.0438 119.0488 91.0545 372.2749 312.2542 91.0545	30
928	m2509	9.18									842.416		842.4156 147.0437 119.0491 250.2525 312.2527 372.2737 70.0659	30
929	m2511	10.82									843.31		843.3101	30
930	m2526	1.25									851.777		851.7772 245.0503 173.0292 127.0382 407.1025 197.0285 509.1336	30
931	m2529	5.17									853.361		853.3607 605.1890 443.1366 425.1243 234.9894 407.1243 209.1535	30
932	m2538	4.78					Kaempferol O-hexosyl-O-hexosyl-O-malonylhexoside	Flavonoid	C36H42O24	859.214	859.213	-0.581927	859.2134 287.0543 449.1060 611.1709 85.0287	30			B
933	m2544	14.64									861.408		861.4078 829.7773 550.9821 224.4350 256.7894 118.5291	30
934	m2545	15									861.408		861.4079 699.3522 425.4916 161.4026 91.9564 303.9922 274.2355	30
935	m2555	1.41									867.282		867.2817 245.0501 525.1648 724.5301 354.1077 203.0397	30
936	m2566	8.85									872.426		872.4263 145.0280 177.0543 117.0334 250.2534 312.2520 372.2726	30
937	m2568	16.86									873.485		873.4852 359.1711 616.3243 149.0121 559.4177 278.1450 337.2015	30
938	m2581	7.38									883.647		883.6467 566.4263 548.4153 209.1646 322.2480 435.3321 227.1744	30
939	m2584	6.17									887.4		887.4005	30
940	m2601	4.9				METLIN	Kaempferol di O-rhamnosyl-O-hexoside	Flavonoid	C39H50O24	903.277	903.276	-0.110708	903.2764 287.0544 449.1073 85.0288 121.0286 595.1648 71.0498	30			B
941	m2602	5.21									903.458		903.4583 95.0495 209.1532 191.1427 133.1010 153.0907 535.5490	30
942	m2606	8.33									905.679		905.6788 114.0915 96.0812 209.1646 69.0706 322.2485	30
943	m2612	5.22									911.395		911.3953 636.2638 589.2169 427.1635 721.2621 409.1531	30
944	m2624	4.62				METLIN	Quercetin di O-rhamnosyl-O-hexoside	Flavonoid	C39H50O25	919.271	919.271	-0.543909	919.2709 303.0493 287.0546 465.1021 611.1566 229.0490 85.0290	30			B
945	m2629	20.63									919.506		919.5065 471.2471 134.9816 337.2730 81.0704 359.2555	30
946	m2630	16.27									921.612		921.6119 333.1728 315.1620 627.3930 146.9961 351.1837	30
947	m2631	7.5									923.69		923.6897 114.0914 209.1644 322.2477 168.0114 132.1015	30
948	m2632	8.33									925.153		925.1531	30
949	m2633	9.35									925.154		925.1542	30
950	m2636	8.33									927.661		927.6608 891.6342 754.2653 70.1652 113.1083 287.7489	30
951	m2637	9									927.388		927.3875 70.0658 118.0653 146.0599 358.1392 715.3058	30
952	m2641	1.37									933.128		933.1275 248.8959 94.9299 591.0110 763.4413	30
953	m2645	6.83									935.209		935.2094 377.0170 395.0269 631.0946 649.1021	30
954	m2649	22.57									939.621		939.6214	30
955	m2656	8.33									943.634		943.6339 550.4670 766.9325 301.3621 176.5829	30
956	m2657	6.83									944.652		944.6519 492.3156 252.2317 474.3031 276.2323 70.0658	30
957	m2677	21.02									959.57		959.5696 681.3442 519.2940 91.9585 220.4228	30
958	m2690	12.22									969.597		969.5966	30
959	m2691	13.77									969.597		969.5967	30
960	m2706	15.37									983.468		983.4681 535.2695 287.0545 447.2150 433.2039 91.9233	30
961	m2707	15.75									983.468		983.4681	30
962	m2716	20.68									991.558		991.5585	30

## Sheet: Table S3
Supplemental Table 3: List of mulberry resources analyzed to obtain data for MMHub
ID	Resource name
ml001	M. alba var. Taiwansijiguosang
ml002	M. alba var. Taiwanlongguosang
ml003	M. alba var. Taiwandaguosang
ml004	M. alba var. Baiyuwang
ml005	M. alba var. 8632
ml006	M. alba var. Wittiorum
ml007	M. alba var. Jinqiang No.82
ml008	M. alba var. Jinqiang No.63
ml009	M. alba var. Gui 23
ml010	M. alba var. Emeihuasang
ml011	M. alba var. Ichibei 34
ml012	M. alba var. Langzhongdayesang
ml013	M. alba var. 603133
ml014	M. alba var. Yusang
ml015	M. alba var. Banqiao No.6
ml016	M. alba var. 607138
ml017	M. alba var. Huai 30-2
ml018	M. alba var. Lesangdahongpi 30
ml019	M. alba var. Tuosang 25
ml020	M. alba var. Heyebai 36
ml021	M. alba var. Jiadingsang 29
ml022	M. alba var. Yidashoumusang 31
ml023	M. alba var. Wupisang
ml024	M. alba var. Jimengsang
ml025	M. alba var. Shidian No.6
ml026	M. alba var. Dejiang No.13
ml027	M. alba var. Gui 14
ml028	M. alba var. Huosang
ml029	M. alba var. Baojing No.7
ml030	M. alba var. Pisang No.2
ml031	M. alba var. Mangshi No.10
ml032	M. alba var. Tortuoso
ml033	M. alba var. Shanxitiansang
ml034	M. alba var. Shenglidaye
ml035	M. alba var. Xinjiansang No.4
ml036	M. alba var. Lizhuang 5
ml037	M. alba var. Changyajingsang 17
ml038	M. alba var. Dayezaoshengsang
ml039	M. alba var. Nongsang 14
ml040	M. alba var. Xiang No.0
ml041	M. alba var. Yun 3
ml042	M. alba var. Shin-Ichinose
ml043	M. alba var. Huanglusang 13
ml044	M. alba var. Pendula 1
ml047	M. alba var. Shansang 305
ml050	M. alba var. Laevigata
ml051	M. alba var. Hanguodabaizhengzhu
ml052	M. alba var. Hongguo No.2
ml053	M. alba var. Kanwa
ml054	M. alba var. Yun No.3
ml055	M. alba var. Shin-ichibei
ml056	M. alba var. Shiping
ml057	M. alba var. 6071
ml058	M. alba var. Ribengailiangshizi
ml060	M. alba var. Gongnongjingsang
ml061	M. alba var. 6031
ml062	M. alba var. Cathayana
ml063	M. alba var. Shengnan
ml064	M. alba var. Ichibei
ml065	M. alba var. Shimiansang
ml066	M. alba var. Yidashoumusang
ml067	M. alba var. Zhuangelou
ml068	M. alba var. Kuisang
ml069	M. alba var. Nongsang No.8
ml070	M. alba var. Gailiangshufan
ml071	M. alba var. Shanxitiansang
ml072	M. alba var. Baokan 61
ml073	M. nigra
ml076	M. alba var. Hongguo No.1
ml079	M. alba var. Jianpuzhai
ml088	M. alba var. Pendula
ml089	M. alba var. Agentingsang
ml091	M. alba var. Yunguo No.1
ml092	M. alba var. Yun 1
ml093	M. alba var. Yun 2
ml094	M. alba var. Yun 3
ml095	M. alba var. Yun 4
ml096	M. alba var. Yun 5
ml097	M. alba var. Yun 6
ml098	M. alba var. Yun 7
ml100	M. alba var. Yun 9
ml103	M. alba var. Yun 12
ml104	M. alba var. Yun 13
ml105	M. alba var. Yun 14
ml110	M. alba var. Yun 19
ml111	M. alba var. Zhenzhubai
ml112	M. alba var. Mongolica
ml114	M. alba var. Shuangtouheyebai
ml115	M. alba var. Zu 83122
ml116	M. alba var. Meiguosang
chuan	M. notabilis
